# Supplementary material for: Many-Server Queueing Systems with Heterogeneous Strategic Servers in Heavy Traffic
Source: Atypon-hosted journal article supplement (doi:10.1287/opre.2022.0608), 2025-08-25
Supplement: opre.2022.0608.sm2.pdf [file opre.2022.0608.sm2.pdf]

## Proofs for Theorems

In this electronic companion, we present the proofs of the technical results presented in our manuscript “Many-Server Queueing Systems with Heterogeneous Strategic Servers in Heavy Traffic”. The proofs are organized following the sections in the main document.

### EC.1. Additional Notation

In addition to the notation described in Section [1.2](#), we define the short-hand notation  $x \wedge y := \min\{x, y\}$ . Set  $d_S$  to be the metric for Skorokhod- $J_1$  topology and lastly, we denote the optional quadratic variation of a stochastic process  $Y(t)$  as  $[Y]_t$ .

### EC.2. Proofs for Results Presented in Section [3.2](#)

LEMMA [1](#) For  $1/2 \leq \alpha \leq 1$  and  $t \geq 0$ , the sequence of processes  $\{(\hat{X}_\alpha^n(t))^+\}_{n \in \mathbb{N}}$  and  $\{\hat{J}_\alpha^n(t)\}_{n \in \mathbb{N}}$  are stochastically bounded. Moreover, for  $1/2 < \alpha \leq 1$  there exists a time  $t_M > 0$  such that  $\sup_{t_M \leq t \leq T} (\hat{X}_\alpha^n(t))^+ \xrightarrow{p} 0$  for all  $T > t_M$  as  $n \rightarrow \infty$ .

*Proof.* Let  $T > 0$ ,  $n \in \mathbb{N}$ , and set  $\theta^{n,0} := \inf\{t \geq 0 : (\hat{X}_\alpha^n(t))^+ \leq 0\}$ . Then, for all  $0 \leq t \leq \theta^{n,0}$ ,

$$\begin{aligned} (\hat{X}_\alpha^n(t))^+ &\leq (\hat{X}_\alpha^n(0))^+ + n^{-\alpha} A^n(t) - n^{-\alpha} \sum_{k=1}^{N_\alpha^n} S_k(\tilde{\mu}_k^n t), \\ &\leq (\hat{X}_\alpha^n(0))^+ + n^{-\alpha} (A^n(t) - \lambda^n t) - n^{-\alpha} \sum_{k=1}^{N_\alpha^n} (S_k(\tilde{\mu}_k^n t) - \tilde{\mu}_k^n t) \\ &\quad + n^{-\alpha} (\lambda^n - N_\alpha^n \bar{\mu}_F) t - n^{-\alpha} \sum_{k=1}^{N_\alpha^n} (\tilde{\mu}_k^n - \bar{\mu}_F) t \\ &\xrightarrow{p} \xi_0 - \beta \bar{\lambda}^\alpha \bar{\mu}_F^{1-\alpha} t. \end{aligned} \tag{EC.1}$$

Defining  $\theta_\epsilon^{n,1} := \inf\{s > \theta^{n,0} : (\hat{X}_\alpha^n(s))^+ > \epsilon\}$  and  $\tilde{\theta}_\epsilon^{n,1} := \sup\{\theta^{n,0} \leq s < \theta_\epsilon^{n,1} : (\hat{X}_\alpha^n(s))^+ < \epsilon/2\}$ ,

$$\begin{aligned} \mathbb{P}\left(\sup_{\theta^{n,0} \leq s \leq T} (\hat{X}_\alpha^n(s))^+ > \epsilon\right) &\leq \mathbb{P}\left(\theta^{n,0} < \tilde{\theta}_\epsilon^{n,1} \leq \theta_\epsilon^{n,1} \leq T\right) \\ &\leq \mathbb{P}\left(\sup_{\theta^{n,0} \leq s_1 < s_2 \leq T} \left\{ \left| \frac{A^n(s_2) - A^n(s_1) - \lambda^n(s_2 - s_1)}{n^\alpha} \right| \right\}\right) \end{aligned}$$

$$\begin{aligned}
& + \left| \frac{\sum_{k=1}^{N^n} (S_k(\tilde{\mu}_k s_2) - S_k(\tilde{\mu}_k s_1) - \tilde{\mu}_k (s_2 - s_1))}{n^\alpha} \right| \\
& + \left| \frac{(\lambda^n - \sum_{k=1}^{N^n} \tilde{\mu}_k)(s_2 - s_1)}{n^\alpha} \right| \Bigg\} > \epsilon/2 \Bigg) \\
& \leq 2\mathbb{P} \left( n^{-\alpha} |A^n(s) - \lambda^n s|_T^* > \epsilon/16 \right) + 2\mathbb{P} \left( n^{-\alpha} \left| \sum_{k=1}^n S_k^n(s) - \tilde{\mu}_k^n s \right|_T^* > \epsilon/16 \right) \\
& + \mathbb{P} \left( n^{-\alpha} \left( \lambda^n - \sum_{k=1}^{N^n} \tilde{\mu}_k \right) > 0 \right). \tag{EC.2}
\end{aligned}$$

The right-hand side of (EC.2) converges to 0, and combining (EC.1) and (EC.2) we obtain the stochastic boundedness of  $\{(\hat{X}_\alpha^n(t))^+\}_{n \in \mathbb{N}}$ . Now, setting  $t_M = (M_0 + 1)/\bar{\lambda}^\alpha \bar{\mu}_F^{1-\alpha}$ , we have

$$\mathbb{P} \left( \sup_{t_M \leq s \leq T} (\hat{X}_\alpha^n(s))^+ > \epsilon \right) \leq \mathbb{P} \left( \sup_{\theta^{n,0} \leq s \leq T} (\hat{X}_\alpha^n(s))^+ > \epsilon, \theta^{n,0} \leq t_M \right) + \mathbb{P}(\theta^{n,0} > t_M).$$

Equation (EC.2) implies that the first probability term on the right-hand side converges to 0. For the second term,  $\theta^{n,0} > t_M$  implies that  $(\hat{X}_\alpha^n(t_M))^+ > 0$ . Equation (EC.1) then implies that the probability of this event goes to 0, which proves the second part of the lemma.

We now prove the stochastic boundedness of  $\{\hat{I}_\alpha^n(t)\}_{n \in \mathbb{N}}$ . The case when  $\alpha = 1/2$  was established in Lemma 1 in [Büke and Qin \(2023\)](#). The proof for  $1/2 < \alpha \leq 1$  is simpler. We have

$$\begin{aligned}
\left| \hat{I}_\alpha^n(t) \right|_T^* & \leq \left| \hat{X}_\alpha^n(0) \right| + \left| \frac{A^n(t) - \lambda^n t}{n^\alpha} \right|_T^* + \left| \frac{\sum_{k=1}^{N^n} S_k^n(t) - \mu_k^n t}{n^\alpha} \right|_T^* + \left| \frac{\sum_{k=1}^{N^n} \mu_k^n t - \lambda^n t}{n^\alpha} \right|_T^* \\
& + \left| \frac{R^n \left( \gamma \int_0^t (X^n(s) - N_\alpha^n)^+ ds \right) - \gamma \int_0^t (X^n(s) - N_\alpha^n)^+ ds}{n^\alpha} \right|_T^* + \left| \gamma \int_0^t (\hat{X}_\alpha^n(s))^+ ds \right|_T^*.
\end{aligned}$$

The stochastic boundedness of  $\{(\hat{X}_\alpha^n(t))^+\}_{n \in \mathbb{N}}$  and the martingale central limit theorem (c.f., [Pang et al. \(2007\)](#)) implies that the last two terms converge to 0 in probability. The second and third terms converge to 0 in probability due to law of large numbers for Poisson processes. Finally, the first and the fourth terms are stochastically bounded due to Assumption [2](#) and the central limit theorem. This proves the lemma.  $\square$

### EC.3. Proofs for Results Presented in Section [4](#)

**THEOREM [2](#)** *Suppose that the limiting fairness process under the adopted routing policy is  $\eta_{\alpha,t}$ .*

*Then, the scaled system length processes  $\{\hat{X}_\alpha^n\}_{n \in \mathbb{N}} \Rightarrow \xi_\alpha$  as  $n \rightarrow \infty$ , where*

1. if  $\alpha = 1/2$ , then the process  $\xi_\alpha$  is the strong solution to the stochastic differential equation

$$\xi(t) = \xi_0 + \sqrt{2\bar{\lambda}}W(t) + (\beta_F(\bar{\lambda}\bar{\mu}_F)^{1/2} + \zeta_1)t + \langle \iota, \eta_{1/2,t} \rangle \int_0^t \xi^-(s)ds - \gamma \int_0^t \xi^+(s)ds,$$

for all  $t \geq 0$  where  $\zeta_1 \sim \text{Normal}(0, \sigma_F^2 \bar{\lambda}^\alpha \bar{\mu}_F^{-\alpha})$  and  $W$  is a standard Brownian motion.

2. if  $1/2 < \alpha \leq 1$ , then the process  $\xi_\alpha$  is the solution to the ordinary differential equation

$$\xi(t) = \xi_0 + \beta \bar{\lambda}^\alpha \bar{\mu}_F^{1-\alpha} t + \langle \iota, \eta_{\alpha,t} \rangle \int_0^t \xi^-(s)ds, \text{ for all } t \geq 0.$$

*Proof.* Our proof follows the same steps as Theorem 5 in [Büke and Qin \(2023\)](#) with the additional modification on the number of servers. Adding and subtracting appropriate terms to [\(4\)](#) and normalizing with  $n^\alpha$ , we get

$$\begin{aligned} \hat{X}_\alpha^n(t) &= \hat{X}_\alpha^n(0) + \hat{M}_{\alpha,1}^n(t) - \hat{M}_{\alpha,2}^n(t) - \hat{M}_{\alpha,3}^n(t) + n^{-\alpha}(\lambda^n - N_\alpha^n \bar{\mu}_F)t - n^{-\alpha} \left( \sum_{k=1}^{N_\alpha^n} \tilde{\mu}_k^n - N_\alpha^n \bar{\mu}_F \right) t \\ &\quad - \sum_{k=1}^{N_\alpha^n} \tilde{\mu}_k^n \int_0^t \hat{I}_{k,\alpha}^n(s)ds - \gamma \int_0^t (\hat{X}_\alpha^n(s))^+ ds, \end{aligned} \quad (\text{EC.3})$$

where

$$\begin{aligned} \hat{M}_{\alpha,1}^n(t) &:= \frac{A^n(t) - \lambda^n t}{n^\alpha}, \\ \hat{M}_{\alpha,2}^n(t) &:= \frac{S^n \left( \sum_{k=1}^{N_\alpha^n} \tilde{\mu}_k^n \left( t - \int_0^t I_k^n(s)ds \right) \right) - \sum_{k=1}^{N_\alpha^n} \tilde{\mu}_k^n \left( t - \int_0^t I_k^n(s)ds \right)}{n^\alpha}, \\ \hat{M}_{\alpha,3}^n(t) &:= \frac{R^n \left( \gamma \int_0^t (X^n(s) - N_\alpha^n)^+ ds \right) - \gamma \int_0^t (X^n(s) - N_\alpha^n)^+ ds}{n^\alpha}. \end{aligned}$$

Using the martingale central limit theorem, both  $\hat{M}_{\alpha,1}^n(t)$  and  $\hat{M}_{\alpha,2}^n(t)$  converge weakly to 0 when  $\alpha > 1/2$  and to  $\sqrt{\bar{\lambda}}W(t)$ , where  $W(t)$  is a standard Brownian motion when  $\alpha = 1/2$ . To see this, we focus on  $\hat{M}_{\alpha,2}^n$ . The process  $M_{\alpha,2}^n(t)$  is a compensated Poisson process and is a martingale with predictable quadratic variation

$$\frac{\sum_{k=1}^{N_\alpha^n} \tilde{\mu}_k^n \left( t - \int_0^t I_k^n(s)ds \right)}{n^{2\alpha}} = \frac{N_\alpha^n \sum_{k=1}^{N_\alpha^n} \tilde{\mu}_k^n t}{n^{2\alpha} N_\alpha^n} - \frac{\int_0^t \hat{I}_\alpha^n(s)ds}{n^\alpha}.$$

The stochastic boundedness of  $\hat{I}_\alpha^n$  ([Lemma 1](#)) implies that the second term on the right-hand side converges 0 for all  $1/2 \leq \alpha \leq 1$ . Using the law of large numbers, the first term converges to 0 if

$\alpha > 1/2$  and to  $\bar{\lambda}$  if  $\alpha = 1/2$ . The jumps of  $M_{\alpha,2}^n(t)$  are bounded by  $1/n^\alpha$ , hence the martingale central limit theorem implies that  $M_{\alpha,2}^n(t) \Rightarrow \sqrt{\bar{\lambda}}W(t)$ . The proof for  $M_{\alpha,1}^n(t)$  follows the same steps. Similarly,  $\hat{M}_{\alpha,3}^n(t) \Rightarrow 0$  for all  $\alpha \geq 1/2$  as a result of the stochastic boundedness of Lemma [1](#). Plugging in [\(1\)](#), we get  $n^{-\alpha}(\lambda^n - N_\alpha^n \bar{\mu}_F)t \rightarrow -\beta \bar{\lambda}^\alpha \bar{\mu}_F^{1-\alpha} t$ . Finally, using the central limit theorem, we have  $n^{-\alpha} \left( \sum_{k=1}^{N_\alpha^n} \tilde{\mu}_k^n - N_\alpha^n \bar{\mu}_F \right) t \xrightarrow{p} 0$  for  $\alpha > 1/2$  and  $n^{-\alpha} \left( \sum_{k=1}^{N_\alpha^n} \tilde{\mu}_k^n - N_\alpha^n \bar{\mu}_F \right) t \Rightarrow \zeta \bar{\lambda}^\alpha \bar{\mu}_F^{-\alpha} t$  for  $\alpha = 1/2$ , where  $\zeta$  is a normal random variable with mean 0 and variance  $\sigma_F^2$ . As  $\mathcal{S}_\epsilon \eta_{\alpha,t}^n \Rightarrow \mathcal{S}_\epsilon \eta_{\alpha,t}$  for any  $\epsilon > 0$ , using Lemma 2 in [Büke and Qin \(2023\)](#), a modification of the Skorokhod representation theorem, we can assume that all the above processes converge with probability 1 and to prove the theorem, we need only to prove that for any  $\rho > 0$ ,  $\mathbb{P}(d_S(\hat{X}_\alpha^n, \xi_\alpha) > \rho) \rightarrow 0$  as  $n \rightarrow \infty$ , where  $d_S(\cdot, \cdot)$  is the metric for Skorokhod- $J_1$  topology.

For any  $\varpi > 0$ , we can find a sequence of homeomorphisms  $\Lambda^n(t) : [0, T] \rightarrow [0, T]$  with derivative  $\dot{\Lambda}^n(t)$  and  $N_\varpi$  such that for any  $n > N_\varpi$ ,

$$\left| \hat{M}_{\alpha,1}^n(t) + \hat{M}_{\alpha,2}^n(t) + \hat{M}_{\alpha,3}^n(t) - \sqrt{2\bar{\lambda}}W(\Lambda^n t) \right|_T^* \vee \left| \langle \iota, \mathcal{S}_\epsilon \eta_{\alpha,t}^n \rangle - \langle \iota, \mathcal{S}_\epsilon \eta_{\alpha, \Lambda^n(t)} \rangle \right|_T^* \vee \left| \dot{\Lambda}^n(t) - 1 \right|_T^* < \varpi,$$

if  $\alpha = 1/2$  and

$$\left| \hat{M}_{\alpha,1}^n(t) + \hat{M}_{\alpha,2}^n(t) + \hat{M}_{\alpha,3}^n(t) \right|_T^* \vee \left| \langle \iota, \mathcal{S}_\epsilon \eta_{\alpha,t}^n \rangle - \langle \iota, \mathcal{S}_\epsilon \eta_{\alpha, \Lambda^n(t)} \rangle \right|_T^* \vee \left| \dot{\Lambda}^n(t) - 1 \right|_T^* < \varpi,$$

if  $1/2 < \alpha \leq 1$ . We will prove our result by showing

$$\sup_{0 \leq t \leq T} \left| \hat{X}_\alpha^n(t) - \xi_\alpha(\Lambda^n(t)) \right| \rightarrow 0, \text{ w.p. } 1. \quad (\text{EC.4})$$

Using the tightness of the processes, without loss of generality, we can assume that

$$\sup_{n \in \mathbb{N}} \left\{ \left| \langle \iota, \eta_{\alpha,t}^n \rangle \right|_T^* \vee \left| \hat{X}_\alpha^n(t) \right|_T^* \vee \left| \xi_\alpha(t) \right|_T^* \right\} < K.$$

Now, taking  $\xi_\alpha(t)$  to be the solution of the appropriate equation in the statement of the theorem, plugging in the definition of fairness process for the seventh term on the right-hand side of [\(EC.3\)](#),

for any  $\varpi$  we have an  $N_\varpi$  such that  $n > N_\varpi$  implies

$$\begin{aligned} \left| \hat{X}_\alpha^n(t) - \xi(\Lambda^n(t)) \right| &\leq \varpi + \gamma \left| \int_0^t (\hat{X}_\alpha^n(s))^+ ds - \int_0^{\Lambda^n(t)} (\xi(s))^+ ds \right| \\ &\quad + \left| \langle \iota, \eta_{\alpha,t}^n \rangle \int_0^t (\hat{X}_\alpha^n(s))^- ds - \langle \iota, \eta_{\alpha, \Lambda^n(t)} \rangle \int_0^{\Lambda^n(t)} (\xi(s))^- ds \right|. \end{aligned} \quad (\text{EC.5})$$

We can bound the second term on the right-hand side of [\(EC.5\)](#) as

$$\begin{aligned} \left| \int_0^t (\hat{X}_\alpha^n(s))^+ ds - \int_0^{\Lambda^n(t)} (\xi(s))^+ ds \right| &\leq \int_0^t \left| \hat{X}_\alpha^n(s) - \xi_\alpha(\Lambda^n(s)) \right| ds + \int_0^t \left| (1 - \dot{\Lambda}^n(t)) \xi_\alpha(\Lambda^n(s)) \right| ds \\ &\leq \int_0^t \left| \hat{X}_\alpha^n(s) - \xi_\alpha(\Lambda^n(s)) \right| ds + \varpi Kt. \end{aligned}$$

To bound the third term on the right-hand side of [\(EC.5\)](#),

$$\begin{aligned} &\left| \langle \iota, \eta_{\alpha,t}^n \rangle \int_0^t (\hat{X}_\alpha^n(s))^- ds - \langle \iota, \eta_{\alpha, \Lambda^n(t)} \rangle \int_0^{\Lambda(t)} (\xi(s))^- ds \right| \\ &\leq \left| \left( \langle \iota, \eta_{\alpha,t}^n \rangle - \langle \iota, \mathcal{S}_\epsilon \eta_{\alpha,t}^n \rangle \right) \int_0^t (\hat{X}_\alpha^n(s))^- ds - \left( \langle \iota, \eta_{\alpha, \Lambda^n(t)} \rangle - \langle \iota, \mathcal{S}_\epsilon \eta_{\alpha, \Lambda^n(t)} \rangle \right) \int_0^{\Lambda(t)} (\xi_\alpha(s))^- ds \right| \\ &\quad + \left| \left( \langle \iota, \mathcal{S}_\epsilon \eta_{\alpha,t}^n \rangle - \langle \iota, \mathcal{S}_\epsilon \eta_{\alpha, \Lambda^n(t)} \rangle \right) \int_0^t (\hat{X}_\alpha^n(s))^- ds - \langle \iota, \mathcal{S}_\epsilon \eta_{\alpha, \Lambda^n(t)} \rangle \int_0^t \left( (\hat{X}_\alpha^n(s))^- - (\xi_\alpha(\Lambda(s)))^- \right) ds \right| \\ &\quad + \left| \langle \iota, \mathcal{S}_\epsilon \eta_{\alpha, \Lambda^n(t)} \rangle \int_0^t (1 - \dot{\Lambda}(s)) (\xi_\alpha(\Lambda(s)))^- ds \right| \\ &\leq (2\epsilon + \varpi(1+K))Kt + K \int_0^t \left| \hat{X}_\alpha^n(s) - \hat{\xi}(\Lambda(s)) \right| ds. \end{aligned}$$

Plugging these bounds in [\(EC.5\)](#), using Grönwall's inequality, and choosing  $\epsilon$  and  $\varpi$  appropriately, our result follows.  $\square$

Now, we prove the interchangeability of many-server limit and limit as  $t \rightarrow \infty$ . To do so, we need the following uniform integrability result.

**LEMMA EC.1.** *For any  $1/2 \leq \alpha \leq 1$ , the stationary scaled system lengths  $\{\hat{X}_\alpha^n(\infty)\}_{n \in \mathbb{N}}$  are uniformly integrable and hence tight.*

*Proof.* For any  $n \in \mathbb{N}$ , we decompose the scaled system length process into its negative and positive parts as

$$\hat{X}_\alpha^n(\infty) = \left( \hat{X}_\alpha^n(\infty) \right)^+ - \left( \hat{X}_\alpha^n(\infty) \right)^-,$$

and prove the uniform integrability of each part separately. We consider  $\left( \hat{X}_\alpha^n(t) \right)^-$  and use a coupling argument. Now, suppose we fix  $n > 0$  and let  $\theta_{A,i}^n$  be the occurrence time of the  $i$ th event for Poisson process  $A^n(t)$ . Assume that we know  $(\tilde{\mu}_1^n, \dots, \tilde{\mu}_{N_\alpha^n}^n)$  and define  $\tilde{S}^n(t)$  to be a Poisson process with rate  $\sum_{k=1}^{N_\alpha^n} \tilde{\mu}_k^n$  and let  $\theta_{S,i}^n$  be the occurrence time for the  $i$ th event. We also define a

sequence  $\{U_i^n\}_{i \in \mathbb{N}}$  of independent uniform(0,1) random variables. For any given time  $t$ , we know that the system should be serving with a rate equal to the sum of service rates of busy servers, i.e.,  $\sum_{k=1}^{N^n} \tilde{\mu}_k^n (1 - I_k^n(t))$ , hence we use the thinning property of Poisson process where event  $i$  of  $\tilde{S}^n(t)$  is accepted as an actual departure with probability  $p_i^n(\theta_{S_i}^n -) = \frac{\sum_{k=1}^{N^n} \tilde{\mu}_k^n (1 - I_k^n(\theta_{S_i}^n -))}{\sum_{k=1}^{N^n} \tilde{\mu}_k^n}$  by checking whether  $U_i^n \leq p_i^n(\theta_{S_i}^n -)$  or not. The processes  $I_k^n(t)$  can be rigorously defined by using  $U_i^n$ s and a routing process based on our routing policy. As this does not play a major role in our proof, we refer the reader to [Büke and Qin \(2023\)](#) for the detailed construction of idleness processes. Now, we can write

$$\begin{aligned} \left(\hat{X}_\alpha^n(t)\right)^- &= \left(\hat{X}_\alpha^n(0)\right)^- + n^{-\alpha} \sum_{i=1}^{\tilde{S}^n(t)} \mathbb{I} \left( \left(\hat{X}_\alpha^n(\theta_{S_i}^n -)\right)^+ = 0 \right) \mathbb{I} \left( U_i^n \leq p_i^n(\theta_{S_i}^n -) \right) \\ &\quad - n^{-\alpha} \sum_{i=1}^{A^n(t)} \mathbb{I} \left( \left(\hat{X}_\alpha^n(\theta_{A_i}^n -)\right)^- > 0 \right). \end{aligned}$$

We define a birth-death process  $\{Y_1^n(t)\}_{n \in \mathbb{N}}$  with  $Y_1^n(0) = (X^n(0))^-$  w.p.1, whose birth rate at  $Y^n(t) = i$  is  $\sum_{k=1}^{N^n} \tilde{\mu}_k^n - \mu_{\min} i$  and death rate is  $\lambda^n$  if  $Y_1^n(t) > 0$ . Then, we can couple the scaled process  $\hat{Y}_1^n(t) = n^{-\alpha} Y_1^n(t)$  with the system length process by writing it as

$$\hat{Y}_1^n(t) = \hat{Y}_1^n(0) + n^{-\alpha} \sum_{i=1}^{\tilde{S}^n(t)} \mathbb{I} \left( U_i^n \leq \tilde{p}_i^n(\theta_{S_i}^n -) \right) - n^{-\alpha} \sum_{i=1}^{A^n(t)} \mathbb{I} \left( \hat{Y}_1^n(\theta_{A_i}^n -) > 0 \right),$$

where  $\tilde{p}_i^n(\theta_{S_i}^n -) := \frac{\sum_{k=1}^{N^n} \tilde{\mu}_k^n - \mu_{\min} \hat{Y}_1^n(\theta_{S_i}^n -)}{\sum_{k=1}^{N^n} \tilde{\mu}_k^n}$ . To see that  $\left(\hat{X}_\alpha^n(t)\right)^- \leq \hat{Y}_1^n(t)$  for all  $t \geq 0$  with probability 1, define  $\vartheta^n = \left\{ t : \left(\hat{X}_\alpha^n(t)\right)^- > \hat{Y}_1^n(t) \right\}$ . As at most one event occurs at any given time  $t$  with probability 1, we have  $\left(\hat{X}_\alpha^n(\vartheta^n -)\right)^- = \hat{Y}_1^n(\vartheta^n -)$ . By definition we have

$$\tilde{p}_i^n(\vartheta^n -) \geq p_i^n(\vartheta^n -).$$

Hence, if  $\vartheta^n$  is an event epoch for  $\tilde{S}^n(t)$ , we have  $\left(\hat{X}_\alpha^n(\vartheta^n)\right)^- \leq \hat{Y}_1^n(\vartheta^n)$  and if  $\vartheta^n$  is an event epoch for  $A^n(t)$ , we have  $\left(\hat{X}_\alpha^n(\vartheta^n)\right)^- = \hat{Y}_1^n(\vartheta^n)$ , both contradicts with the definition of  $\vartheta^n$ . Hence, we conclude that  $\left(\hat{X}_\alpha^n(t)\right)^- \leq \hat{Y}_1^n(t)$  for all  $t \geq 0$  with probability 1.

Now, define  $\zeta^n := n^{-\alpha} \left( \sum_{k=1}^{N^n} \tilde{\mu}_k^n - N^n \bar{\mu} \right)$  and by re-arranging the terms we have

$$\sum_{k=1}^{N^n} \tilde{\mu}_k^n = \lambda^n + \beta (\lambda^n)^\alpha \bar{\mu}^{1-\alpha} + n^\alpha \zeta^n.$$

Take  $M_1 := (\beta(\lambda^n)^\alpha \bar{\mu}^{1-\alpha} + n^\alpha \zeta^n)^+ + 2n^\alpha$ , and define a new birth-death process  $Y_2^n(t)$  with  $Y_2^n(0) = Y_1^n(0)$  with probability 1, whose birth rate at  $Y_2^n(t) = i$  is  $\lambda^n - \mu_{\min} \min\{i, M_1\}$  and death rate is  $\lambda^n$  at  $Y_2^n(t) \neq 0$ . By definition,  $Y_2(t)$  is stochastically greater than  $Y_1^n(t)$ . Using a similar argument as above, we can couple  $Y_2(t)$  with a simple birth death process  $Y_3^n(t)$  where  $Y_3^n(0) = (Y_2^n(0) - M)^+$  with birth rate  $\lambda^n - \mu_{\min} M_1$ , death rate  $\lambda^n$  and  $Y_2^n(t) \leq M_1 + Y_3^n(t)$  for all  $t \geq 0$ . As birth and death rates are constants,  $Y_3(t)$  is equivalent to an  $M/M/1$  queue. Hence, we can prove that  $(\hat{X}^n(\infty))^-$  is uniformly integrable by showing that  $\sup \mathbb{E} \left[ (n^{-\alpha} (M_1 + Y_3^n(\infty)))^2 \right] < \infty$ . For  $n \in \mathbb{N}$ ,

$$\begin{aligned} \mathbb{E} \left[ (n^{-\alpha} (M_1 + Y_3^n(\infty)))^2 \right] &= n^{-2\alpha} \left( \mathbb{E}[M_1^2] + 2\mathbb{E}[M_1 Y_3^n(\infty)] + \mathbb{E} \left[ (Y_3^n(\infty))^2 \right] \right) \\ &= n^{-2\alpha} \left( \mathbb{E} [M_1^2] + 2\mathbb{E} [M_1 \mathbb{E}[Y_3^n(\infty) | \bar{\mu}]] + \mathbb{E} \left[ \mathbb{E} \left[ (Y_3^n(\infty))^2 | \bar{\mu} \right] \right] \right) \\ &= n^{-2\alpha} \left( \mathbb{E} [M_1^2] + 2\mathbb{E} \left[ \frac{\lambda^n - \mu_{\min} M_1}{\mu_{\min}} \right] + \mathbb{E} \left[ \frac{(\lambda^n - \mu_{\min} M_1)(2\lambda^n - \mu_{\min} M_1)}{\mu_{\min}^2 M_1^2} \right] \right) \\ &= n^{-2\alpha} \left( \mathbb{E} [M_1^2] + \frac{2\lambda^n}{\mu_{\min}} - 2\mathbb{E} [M_1] + 2\mathbb{E} \left[ \frac{(\lambda^n)^2}{\mu_{\min}^2 M_1^2} \right] - 3\mathbb{E} \left[ \frac{\lambda^n}{\mu_{\min} M_1} \right] + 1 \right) \\ &\leq n^{-2\alpha} \left( \mathbb{E} [M_1^2] + \frac{2\lambda^n}{\mu_{\min}} + 2\mathbb{E} [M_1] + \frac{2(\lambda^n)^2}{\mu_{\min}^2 n^{2\alpha}} + \frac{3\lambda^n}{\mu_{\min} n^\alpha} + 1 \right). \end{aligned}$$

Assumption [1](#) implies that the second, fourth and fifth terms converge to a finite number for any  $\alpha \geq 1/2$  and hence can be bounded uniformly for any  $n$ . Also, using the identity  $(a+b)^2 \leq 2a^2 + 2b^2$ , we have

$$n^{-2\alpha} \mathbb{E} [M_1^2] \leq 4n^{-2\alpha} \beta^2 (\lambda^n)^{2\alpha} \bar{\mu}^{2-2\alpha} + 4\mathbb{E}[(\zeta^n)^2] + 2.$$

Again we can use Assumption [1](#) to show that the first term converges to a finite number. Using independence we have

$$\mathbb{E}[(\zeta^n)^2] = n^{-2\alpha} \mathbb{E} \left[ \left( \sum_{k=1}^{N^n} \tilde{\mu}_k^n - N^n \bar{\mu} \right)^2 \right] = n^{-2\alpha} \mathbb{E} \left[ \sum_{k=1}^{N^n} (\tilde{\mu}_k^n - \bar{\mu})^2 \right] \leq n^{-2\alpha} N^n (\mu_{\max} - \mu_{\min})^2,$$

which also converges and hence can be uniformly bounded for all  $n$ . Similarly,

$$n^{-2\alpha} \mathbb{E}[M_1] \leq n^{-2\alpha} \mathbb{E}[\beta(\lambda^n)^\alpha \bar{\mu}^{1-\alpha} |\mu_{\max} - \mu_{\min}| + 2n^{-\alpha}] - n^{-2\alpha} N^n,$$

which also converges and proves the uniform integrability of  $\left\{ (\hat{X}_\alpha^n(\infty))^- \right\}_{n \in \mathbb{N}}$ . The proof of the uniform integrability of  $\left\{ (\hat{X}_\alpha^n(\infty))^+ \right\}_{n \in \mathbb{N}}$  follows the same lines and hence is omitted.  $\square$

**THEOREM 3** *For many-server systems with random and heterogeneous service rates, for any  $1/2 \leq \alpha \leq 1$  the following convergence results hold as  $n \rightarrow \infty$ :*

1.  $\hat{X}_\alpha^n(\infty) \Rightarrow \xi_\alpha(\infty)$ ,
2.  $\mathbb{E}[\hat{X}_\alpha^n(\infty)] \rightarrow \mathbb{E}[\xi_\alpha(\infty)]$ ,
3.  $\eta_\infty^n \Rightarrow \eta_\infty$ ,

where  $\xi_\alpha(t) \Rightarrow \xi_\alpha(\infty)$  and  $\eta_t \Rightarrow \eta_\infty$  as  $t \rightarrow \infty$ .

*Proof.* Suppose  $\hat{X}_\alpha^n(0), (\tilde{\mu}_1^n, \dots, \tilde{\mu}_{N_\alpha}^n)$  are distributed according to the stationary measure of the  $n$ th system  $\pi^n$ . Then,  $\hat{X}_\alpha^n(t), (\tilde{\mu}_1^n, \dots, \tilde{\mu}_{N_\alpha}^n)$  are also distributed according to  $\pi^n$ . As we know that the  $\{\pi^n\}$  are tight and  $\hat{X}_\alpha^n(t) \Rightarrow \xi_\alpha(t)$ , the first convergence holds and the second convergence holds as a result of the uniform integrability. To see the third one, we need to see that

$$\lim_{T \rightarrow \infty} \frac{1}{T} \sum_{k=1}^{N^n} \delta_{\tilde{\mu}_k^n}(\mathbb{A}) \int_0^T \hat{I}_k^n(s) ds = \sum_{k=1}^{N^n} \delta_{\tilde{\mu}_k^n}(\mathbb{A}) \mathbb{E}[I_k^n(\infty) | \tilde{\mu}].$$

Again, starting with a stationary system and using the uniform integrability the result follows.

□

#### EC.4. Proofs for Results Presented in Section 5

**LEMMA 2** *The set of scaled instantaneous allocations,  $\{\bar{\psi}_t^n\}_{n \in \mathbb{N}}$ , is tight.*

*Proof.* We define the discrete-time measure-valued stochastic process  $\mathcal{U}_{A,i}^n(\mathbb{A}) = \delta_{\mu_k}(\mathbb{A}) \mathbb{I}(X^n(\theta_{A,i}^n -) \leq 0)$  for all  $\mathbb{A} \in \mathcal{B}(\mathbb{R}_+)$  if the  $i$ th incoming arrival in the  $n$ th system is immediately routed to server  $k$  and 0 (thought as a measure) otherwise. Similarly, we define  $\mathcal{U}_{S,i}^n(\mathbb{A}) = \delta_{\mu_k}(\mathbb{A}) \mathbb{I}(X^n(\theta_{S,i}^n -) \leq 0)$  for all  $\mathbb{A} \in \mathcal{B}(\mathbb{R}_+)$ , if the  $i$ th potential service completion is from  $k$ th server, if it is not an actual service completion  $\mathcal{U}_{S,i}^n = 0$ . Then, for any  $f \in C^b$  we have the following balance

$$\langle f, \bar{\psi}_t^n \rangle = \langle f, \bar{\psi}_0^n \rangle + n^{-1} \sum_{i=1}^{S^n(t)} \langle f, \mathcal{U}_{S,i}^n \rangle - n^{-1} \sum_{i=1}^{A^n(t)} \langle f, \mathcal{U}_{A,i}^n \rangle. \quad (\text{EC.6})$$

To prove tightness, we use the conditions introduced by [Jakubowski \(1986\)](#) that we recall next.

THEOREM EC.1 (**Jakubowski (1986)**). *A sequence of stochastic processes  $\{\eta_t^n\}_{n \in \mathbb{N}}$  taking values in  $\mathbb{D}_{\mathcal{P}}[0, T]$  is tight if and only if:*

J1. (*Compact Containment Condition*) *For each  $\rho, T > 0$ , there exists a compact set  $\mathcal{K}_\rho \subset \mathcal{P}$  such that*

$$\liminf_{n \rightarrow \infty} \mathbb{P}(\bar{\psi}_t^n \in \mathcal{K}_\rho, \text{ for all } t \in [0, T]) > 1 - \rho.$$

J2. *There exists a family of functions  $\mathbb{F}$  such that*

- i.  $H \in \mathbb{F}: \mathcal{P} \rightarrow \mathbb{R}$ ,  $\mathbb{F}$  separates points in  $\mathcal{P}$  and  $\mathbb{F}$  is closed under addition.
- ii. For any fixed  $H \in \mathbb{F}$ , the sequence of functions  $\{h^n(t) := H(\eta_t^n), \text{ for all } t \in \mathbb{R}\}_{n \in \mathbb{N}}$  is tight in  $\mathbb{D}_{\mathbb{R}}[0, \infty)$  endowed with Skorokhod- $J_1$  topology.

We now return to our proof. Using Lemma **1**, we know that, for all  $\epsilon > 0$ , there exists a  $K_\epsilon$  such that  $\mathbb{P}(\sup_{0 \leq t \leq T} |\hat{I}_\alpha^n(t)| > K_\epsilon) < \epsilon$  for all  $n \in \mathbb{N}$ . Define  $\mathcal{K}_\epsilon$  as the set of measures bounded by  $K_\epsilon$  on the support  $[\mu_{\min}, \mu_{\max}]$ . The set  $\mathcal{K}_\epsilon$  is compact and Lemma **1** implies J1.

To show that J2 holds, we define

$$\mathbb{F} = \{H : \mathcal{M}_F[\mu_{\min}, \mu_{\max}] \rightarrow \mathbb{R} : \exists f \in \mathcal{C}_{\mathbb{R}_+^b}[0, \infty) \text{ such that } H(\psi) = \langle f, \psi \rangle \text{ for all } \psi \in \mathcal{M}_F\},$$

where  $\mathcal{M}_F[\mu_{\min}, \mu_{\max}]$  is the set of finite measures on  $[\mu_{\min}, \mu_{\max}]$ . The set  $\mathbb{F}$  separates the points in  $\mathcal{M}_F$  and is closed under addition. Take  $K_f$  such that  $H(\psi) = \langle f, \psi \rangle$  with  $f(\mu) \leq K_f$  for all  $\mu \in [\mu_{\min}, \mu_{\max}]$ . To show tightness of  $\{\langle f, \bar{\psi}_t^n \rangle\}_{n \in \mathbb{N}}$ , we need to show that for all  $\epsilon, \rho > 0$

1. there exists an  $M_{f, \epsilon}$  such that  $\mathbb{P}(\sup_{0 \leq t \leq T} |\langle f, \bar{\psi}_t^n \rangle| > M_{f, \epsilon}) < \epsilon$  and
2. there exists a  $\rho$  and an  $N_\rho$  such that for all  $n > N_\rho$ ,  $\mathbb{P}(w(\langle f, \bar{\psi}_t^n \rangle, \rho) \geq \epsilon) < \epsilon$ , where

$$w(\langle f, \bar{\psi}_t^n \rangle, \rho) = \inf_{\{t_i\}} \max_i \sup_{t_i \leq t, s \leq t_{i+1}} |\langle f, \bar{\psi}_t^n \rangle - \langle f, \bar{\psi}_s^n \rangle|$$

and  $\{t_i\}_{0 \leq i \leq \nu}$  is any  $\rho$ -sparse set, i.e.,  $0 = t_0 < t_1 < \dots < t_\nu = T$  with  $\min_i |t_{i+1} - t_i| > \rho$ .

Again taking  $M_{f, \rho} = K_\rho K_f$ , we have

$$\mathbb{P}\left(\sup_{0 \leq t \leq T} |\langle f, \bar{\psi}_t^n \rangle| > M_{f, \rho}\right) \leq \mathbb{P}\left(K_f \sup_{0 \leq t \leq T} \hat{I}^n(t) > M_{f, \rho}\right) \leq \rho,$$

which implies the first condition. Now, we prove the second condition. Using [\(EC.6\)](#), for any  $0 \leq s < t \leq T$  we have

$$\begin{aligned}
|\langle f, \bar{\psi}_t^n \rangle - \langle f, \bar{\psi}_s^n \rangle| &= \left| n^{-1} \sum_{i=1}^{S^n(t)} \langle f, \mathcal{U}_{S,i}^n \rangle - n^{-1} \sum_{i=1}^{A^n(t)} \langle f, \mathcal{U}_{A,i}^n \rangle - n^{-1} \sum_{i=1}^{S^n(s)} \langle f, \mathcal{U}_{S,i}^n \rangle - n^{-1} \sum_{i=1}^{A^n(s)} \langle f, \mathcal{U}_{A,i}^n \rangle \right| \\
&\leq n^{-1} K_f \left| S^n(t) - S^n(s) - \sum_{k=1}^{N^n} \mu_k t + \sum_{k=1}^{N^n} \mu_k s \right| + n^{-1} K_f \sum_{k=1}^{N^n} \mu_k |t - s| \\
&\quad + n^{-1} K_f |A^n(t) - A^n(s) - \lambda^n t + \lambda^n s| + n^{-1} K_f \lambda^n |t - s| \\
&\leq n^{-1} K_f \left| S^n(t) - \sum_{k=1}^{N^n} \mu_k t \right| + n^{-1} K_f \left| S^n(s) - \sum_{k=1}^{N^n} \mu_k s \right| \\
&\quad + K_f \left| n^{-1} \sum_{k=1}^{N^n} \mu_k - \bar{\lambda}(1 + \beta) \right| |t - s| + n^{-1} K_f |A^n(t) - \lambda^n t| + |A^n(s) - \lambda^n s| \\
&\quad + n^{-1} K_f \lambda^n |t - s| + \bar{\lambda}(1 + \beta) |t - s| \\
&\leq n^{-2} 2K_f \sup_{0 \leq t \leq T} \left| S^n(t) - \sum_{k=1}^{N^n} \mu_k t \right| + n^{-2} 2K_f \sup_{0 \leq t \leq T} |A^n(t) - \lambda^n t| \\
&\quad + K_f \left| n^{-1} \sum_{k=1}^{N^n} \mu_k - \bar{\lambda}(1 + \beta) \right| |t - s| + n^{-1} K_f \lambda^n |t - s| + \bar{\lambda}(1 + \beta) |t - s|.
\end{aligned} \tag{EC.7}$$

Using the martingale central limit theorem, the first and second terms on the right-hand side converges to 0 in probability. Similarly, using the law of large numbers, we can show that the third term also converges to 0 in probability. Finally, from Assumption [1](#) we know that  $n^{-1} \lambda^n \rightarrow \bar{\lambda}$ . Hence, choosing  $\rho < \epsilon/2(K_f \bar{\lambda}(2 + \beta))$  and  $N$  large enough the second condition follows. Moreover, by examining [\(EC.7\)](#), one can conclude that any limit is continuous.  $\square$

**LEMMA [3](#)** *Assume the subsequence  $\bar{\psi}_t^{n_k} \Rightarrow \bar{\psi}_t$  as  $n_k \rightarrow \infty$ . Then,  $\bar{\psi}_t$  satisfies*

$$\begin{aligned}
\langle f, \bar{\psi}_{1,t} \rangle &= \langle f, \bar{\psi}_{1,0} \rangle + \frac{\bar{\lambda}}{\bar{\mu}} (1 + \beta) \langle f \times \iota, F \rangle \int_0^t \mathbb{I}(\xi_{1,s} \leq 0) ds - \int_0^t \langle f \times \iota, \bar{\psi}_{1,s-} \rangle \mathbb{I}(\xi_{1,s} \leq 0) ds \\
&\quad - \bar{\lambda} \int_0^t \frac{\langle f \times h, \bar{\psi}_{1,s-} \rangle}{\langle h, \bar{\psi}_{s-} \rangle} \mathbb{I}(\xi_{1,s} \leq 0) ds \text{ for all } t \geq 0.
\end{aligned} \tag{EC.8}$$

*Proof.* The martingale central limit theorem (c.f., [Pang et al. \(2007\)](#)) implies  $\sup_{0 \leq t \leq T} n^{-1} |S^n(t) - \sum_{k=1}^{N^n} \mu_k t| \xrightarrow{p} 0$  and  $\sup_{0 \leq t \leq T} n^{-1} |A^n(t) - \lambda^n t| \xrightarrow{p} 0$  Using the Skorokhod

representation theorem (see, e.g., Theorem 6.7 in [Billingsley \(1999\)](#)), we can assume that these and the subsequence in the statement of the lemma converge almost surely. Also, as mentioned in the proof of Lemma [2](#) for any  $f \in C_{\mathbb{R}_+}[0, T]$ , the limit  $\langle f, \bar{\psi}_t \rangle$  is continuous and hence, the convergence holds in the supremum norm as well as the Skorokhod  $d_S$  metric. We define the processes

$$\begin{aligned} M_1^n(t) &:= \sum_{i=1}^{S^n(t)} \langle f, \mathcal{U}_{S,i}^n \rangle - \sum_{i=1}^{S^n(t)} \left\langle f, \frac{\sum_{k=1}^{N_\alpha^n} \mu_k (1 - I_k^n(\theta_{S,i}^n -)) \delta_{\mu_k} \mathbb{I}(X^n(\theta_{S,i}^n -) \leq 0)}{\sum_{k=1}^{N_\alpha^n} \mu_k} \right\rangle, \\ M_2^n(t) &:= \sum_{i=1}^{A^n(t)} \langle f, \mathcal{U}_{A,i}^n \rangle - \sum_{i=1}^{A^n(t)} \left\langle f, \frac{\sum_{k=1}^{N_\alpha^n} h(\mu_k) I_k^n(\theta_{A,i}^n -) \delta_{\mu_k} \mathbb{I}(X^n(\theta_{A,i}^n -) \leq 0)}{\sum_{k=1}^{N_\alpha^n} h(\mu_k) I_k^n(\theta_{A,i}^n -)} \right\rangle, \end{aligned}$$

where  $0/0$  is assumed to be  $0$ . It is easy to see that both  $M_1^n$  and  $M_2^n$  are  $\mathcal{F}_t$  martingales. After some algebraic manipulations, Equation [\(EC.6\)](#) becomes

$$\begin{aligned} \langle f, \bar{\psi}_t^n \rangle &= \langle f, \bar{\psi}_0^n \rangle + n^{-1} M_1^n(t) + n^{-1} \sum_{i=1}^{S^n(t)} \left\langle f, \frac{\sum_{k=1}^{N_\alpha^n} \mu_k (1 - I_k^n(\theta_{S,i}^n -)) \delta_{\mu_k} \mathbb{I}(X^n(\theta_{S,i}^n -) \leq 0)}{\sum_{k=1}^{N_\alpha^n} \mu_k} \right\rangle \\ &\quad - n^{-1} M_2^n(t) - n^{-1} \sum_{i=1}^{A^n(t)} \left\langle f, \frac{\sum_{k=1}^{N_\alpha^n} h(\mu_k) I_k^n(\theta_{A,i}^n -) \delta_{\mu_k} \mathbb{I}(X^n(\theta_{A,i}^n -) \leq 0)}{\sum_{k=1}^{N_\alpha^n} h(\mu_k) I_k^n(\theta_{S,i}^n -)} \right\rangle \\ &= \langle f, \bar{\psi}_0^n \rangle + n^{-1} M_1^n(t) + n^{-1} \frac{\langle f \times \iota, \sum_{k=1}^{N^n} \delta_{\mu_k} \rangle}{\sum_{k=1}^{N^n} \mu_k} \int_0^t \mathbb{I}(X^n(s-) \leq 0) dS^n(s) \\ &\quad - n^{-1} \int_0^t \frac{\langle f \times \iota, \bar{\psi}_{s-}^n \rangle}{n^{-1} \sum_{k=1}^{N^n} \mu_k} \mathbb{I}(X^n(s-) \leq 0) dS^n(s) - n^{-1} M_2^n(t) \\ &\quad - n^{-1} \int_0^t \frac{\langle f \times h, \bar{\psi}_{s-}^n \rangle}{\langle h, \bar{\psi}_{s-}^n \rangle} \mathbb{I}(X^n(s-) \leq 0) dA^n(s) \\ &= \langle f, \bar{\psi}_0^n \rangle + \frac{M_1^n(t)}{n} + \frac{\langle f \times \iota, n^{-1} \sum_{k=1}^{N^n} \delta_{\mu_k} \rangle}{n^{-1} \sum_{k=1}^{N^n} \mu_k} \int_0^t \mathbb{I} \left( \frac{X^n(s-)}{n} \leq 0 \right) d \left( \frac{S^n(s) - \sum_{k=1}^{N^n} \mu_k s}{n} \right) \\ &\quad + \langle f \times \iota, n^{-1} \sum_{k=1}^{N^n} \delta_{\mu_k} \rangle \int_0^t \mathbb{I} \left( \frac{X^n(s-)}{n} \leq 0 \right) ds \\ &\quad - \int_0^t \frac{\langle f \times \iota, \bar{\psi}_{s-}^n \rangle}{n^{-1} \sum_{k=1}^{N^n} \mu_k} \mathbb{I} \left( \frac{X^n(s-)}{n} \leq 0 \right) d \left( \frac{S^n(s) - \sum_{k=1}^{N^n} \mu_k s}{n} \right) - \int_0^t \langle f \times \iota, \bar{\psi}_{s-}^n \rangle \mathbb{I} \left( \frac{X^n(s-)}{n} \leq 0 \right) ds \\ &\quad - \frac{M_2^n(t)}{n} - \int_0^t \frac{\langle f \times h, \bar{\psi}_{s-}^n \rangle}{\langle h, \bar{\psi}_{s-}^n \rangle} \mathbb{I} \left( \frac{X^n(s-)}{n} \leq 0 \right) d \left( \frac{A^n(s) - \lambda^n s}{n} \right) \\ &\quad - \int_0^t \frac{\langle f \times h, \bar{\psi}_{s-}^n \rangle}{\langle h, \bar{\psi}_{s-}^n \rangle} \frac{\lambda^n}{n} \mathbb{I} \left( \frac{X^n(s-)}{n} \leq 0 \right) ds. \tag{EC.9} \end{aligned}$$

Since  $f \in C_{[\mu_{\min}, \mu_{\max}]}^b[0, \infty)$ , we assume that  $f(\mu) \leq K_f$  for all  $\mu \in [\mu_{\min}, \mu_{\max}]$ . By our assumption, we know that  $\sup_{0 \leq t \leq T} |\langle f, \bar{\psi}_t^{n_k} \rangle - \langle f, \bar{\psi}_t \rangle| \rightarrow 0$  almost surely, along the subsequence  $\{\bar{\psi}_t^{n_k}\}_{k=1}^\infty$ . The martingales  $M_1^n(t)$  and  $M_2^n(t)$  can be written as

$$n^{-1}M_1^n(t) = n^{-1} \sum_{i=1}^{S^n(t)} (\langle f, \mathcal{U}_{S,i}^n \rangle - \mathbb{E}[\langle f, \mathcal{U}_{S,i}^n \rangle | \mathcal{F}_{v_i^{n-}}]),$$

$$\text{and } n^{-1}M_2^n(t) = n^{-1} \sum_{i=1}^{A^n(t)} (\langle f, \mathcal{U}_{A,i}^n \rangle - \mathbb{E}[\langle f, \mathcal{U}_{A,i}^n \rangle | \mathcal{F}_{u_i^{n-}}]).$$

Since both are pure jump martingales, we can write the optional quadratic variation of these martingales as

$$[n^{-1}M_1^n(t)] = n^{-2} \sum_{i=1}^{S^n(t)} (\langle f, \mathcal{U}_{S,i}^n \rangle - \mathbb{E}[\langle f, \mathcal{U}_{S,i}^n \rangle | \mathcal{F}_{v_i^{n-}}])^2 \leq \frac{K_f^2}{n^2} \sup_{0 \leq t \leq T} S^n(t)$$

$$[n^{-1}M_2^n(t)] = n^{-2} \sum_{i=1}^{A^n(t)} (\langle f, \mathcal{U}_{A,i}^n \rangle - \mathbb{E}[\langle f, \mathcal{U}_{A,i}^n \rangle | \mathcal{F}_{u_i^{n-}}])^2 \leq \frac{K_f^2}{n^2} \sup_{0 \leq t \leq T} A^n(t)$$

which converges to 0 almost surely. We know that  $h(\mu) > 0$  and it is continuous on the closed interval  $[\mu_{\min}, \mu_{\max}]$  and hence, there exists  $\epsilon_h$  and  $K_h$  such that  $0 < \epsilon_h \leq h(\mu) \leq K_h$  for all  $\mu \in [\mu_{\min}, \mu_{\max}]$ . Also, Assumption [1](#) implies the existence of  $K_N$  and  $k_n$  such that  $0 < \epsilon_N \leq n^{-1}N^n \leq K_N < \infty$ . Hence, we have the following bounds:

$$\langle f \times \iota, \bar{\psi}_t^n \rangle \leq \langle f \times \iota, n^{-1} \sum_{k=1}^{N_\alpha^n} \delta_{\mu_k} \rangle \leq K_f K_N \mu_{\max}, \quad \langle f \times h, \bar{\psi}_{s-}^n \rangle \leq \langle f \times h, n^{-1} \sum_{k=1}^{N_\alpha^n} \delta_{\mu_k} \rangle \leq K_f K_h K_N$$

$$\frac{\langle f \times \iota, \bar{\psi}_t^n \rangle}{n^{-1} \sum_{k=1}^{N_\alpha^n} \mu_k} \leq \frac{\langle f \times \iota, n^{-1} \sum_{k=1}^{N_\alpha^n} \delta_{\mu_k} \rangle}{n^{-1} \sum_{k=1}^{N_\alpha^n} \mu_k} \leq \frac{K_f K_N \mu_{\max}}{\epsilon_N} \quad \text{and} \quad \frac{\langle f \times h, \bar{\psi}_{s-}^n \rangle}{\langle h, \bar{\psi}_{s-}^n \rangle} \leq \frac{K_f K_h}{\epsilon_h}.$$

These bounds along with  $\sup_{0 \leq t \leq T} n^{-1} |S^n(t) - \sum_{k=1}^{N^n} \mu_k t| \rightarrow 0$  and  $\sup_{0 \leq t \leq T} n^{-1} |A^n(t) - \lambda^n t| \rightarrow 0$  almost surely as  $n \rightarrow \infty$ , the third, fifth and the eighth terms on the right-hand side of [\(EC.9\)](#) converges to 0 almost surely. Using the dominated convergence theorem, we deduce that

$$\int_0^t \langle f \times \iota, \bar{\psi}_{s-}^n \rangle \mathbb{I} \left( \frac{X^n(s-)}{n} \leq 0 \right) ds \rightarrow \int_0^t \langle f \times \iota, \bar{\psi}_{s-} \rangle \mathbb{I}(\xi(s-) \leq 0) ds$$

$$\int_0^t \frac{\langle f \times h, \bar{\psi}_{s-}^n \rangle}{\langle h, \bar{\psi}_{s-}^n \rangle} \frac{\lambda^n}{n} \mathbb{I} \left( \frac{X^n(s-)}{n} \leq 0 \right) ds \rightarrow \int_0^t \frac{\langle f \times h, \bar{\psi}_{s-} \rangle}{\langle h, \bar{\psi}_{s-} \rangle} \bar{\lambda} \mathbb{I}(\xi(s-) \leq 0) ds.$$

Hence, our lemma follows.  $\square$

**THEOREM 5** When  $\alpha = 1$ , the stationary limiting fairness measure  $\eta_{1,\infty}$  under an  $h$ -random policy can be written as

$$\eta_{1,\infty}(\mathbb{A}) = \frac{\int_{\mathbb{A}} (1 + L_F \tilde{h}(\mu))^{-1} dF(\mu)}{\int_{\mu_{\min}}^{\mu_{\max}} (1 + L_F \tilde{h}(\mu))^{-1} dF(\mu)}, \text{ for all } \mathbb{A} \in \mathcal{B}[\mu_{\min}, \mu_{\max}] \quad (\text{EC.10})$$

where  $\tilde{h}(\mu) = h(\mu)/\mu$  and  $L_F$  is the unique solution of

$$\int_{\mu_{\min}}^{\mu_{\max}} \mu \frac{1 + \beta}{\bar{\mu}_F (1 + L_F \tilde{h}(\mu))} dF(\mu) = \beta. \quad (\text{EC.11})$$

*Proof.* We know that  $\xi_{1,\infty} > 0$ , and hence any fixed point of (14) satisfies

$$\frac{\bar{\lambda}}{\bar{\mu}} (1 + \beta) \langle f \times \iota, F \rangle \mathbb{I}(\xi_{1,t} \leq 0) = \langle f \times \iota, \bar{\psi}_{1,t} \rangle \mathbb{I}(\xi_{1,t} \leq 0) + \bar{\lambda} \frac{\langle f \times h, \bar{\psi}_{1,t} \rangle}{\langle h, \bar{\psi}_{1,t} \rangle} \mathbb{I}(\xi_{1,t} \leq 0). \quad (\text{EC.12})$$

As (12) implies that  $\bar{\psi}_{1,\infty}$  is absolutely continuous, it possesses a Radon-Nikodym derivative  $\bar{g}(\mu)$  with respect to  $F$ . Setting  $f(\mu) = 1$  for all  $\mu$ , we have

$$\int_{\mu_{\min}}^{\mu_{\max}} \mu \bar{g}(\mu) dF(\mu) = \bar{\lambda} \beta. \quad (\text{EC.13})$$

As the equation holds for any  $f \in \mathbb{C}_{[\mu_{\min}, \mu_{\max}]}^b[0, \infty)$ , defining  $c_g = \int_{\mu_{\min}}^{\mu_{\max}} h(\mu) \bar{g}(\mu) dF(\mu)$  to simplify the notation, for  $F$ -almost all  $\mu$

$$\mu \bar{g}(\mu) + \frac{\bar{\lambda} h(\mu) \bar{g}(\mu)}{c_g} = \frac{\bar{\lambda}}{\bar{\mu}_F} (1 + \beta) \mu.$$

Defining  $L_F = \bar{\lambda}/c_g$  and re-organizing terms, we obtain

$$\bar{g}(\mu) = \frac{\bar{\lambda}}{\bar{\mu}_F} (1 + \beta) (1 + L_F \tilde{h}(\mu))^{-1}. \quad (\text{EC.14})$$

Plugging in (EC.13) we obtain (16), and since the integrand is decreasing in  $L_F$  then the  $L_F$  that satisfies this equation must be unique. This proves that for any limit point  $\bar{\psi}_{1,t}$ , we have  $\langle f, \bar{\psi}_{1,t} \rangle \rightarrow \int_{\mu_{\min}}^{\mu_{\max}} f(\mu) \bar{g}(\mu) dF(\mu)$  as  $t \rightarrow \infty$  for all  $f \in \mathbb{C}_{[\mu_{\min}, \mu_{\max}]}^b[0, \infty)$ . Hence, using the fact that the indicator function of any Borel set  $\mathbb{A}$  can be approximated by functions in  $\mathbb{C}_{[\mu_{\min}, \mu_{\max}]}^b[0, \infty)$ , we have  $\bar{\psi}_{1,t}(\mathbb{A}) \rightarrow \int_{\mathbb{A}} \bar{g}(\mu) dF(\mu)$ . Using Theorem 3 this implies that  $\bar{\psi}_{\infty}^n(\mathbb{A}) \Rightarrow \int_{\mathbb{A}} \bar{g}(\mu) dF(\mu)$  as  $n \rightarrow \infty$ . Plugging  $\bar{\psi}_{1,t}$  into the definition of the fairness process, the result follows.  $\square$

LEMMA [4](#) Define  $h_{\min} = \min_{\mu_{\min} \leq \mu \leq \mu_{\max}} h(\mu)$  and  $h_{\max} = \max_{\mu_{\min} \leq \mu \leq \mu_{\max}} h(\mu)$  and let  $L_F$  be the solution of [\(16\)](#) for some service rate distribution  $F$ . Then,

$$\frac{\beta}{h_{\max}} \leq L_F \leq \frac{\beta}{h_{\min}}. \quad (\text{EC.15})$$

*Proof.* Dividing both sides of [\(EC.13\)](#) by  $\bar{\lambda}\beta$ , this equation defines a probability measure  $\bar{F}$  on  $[\mu_{\min}, \mu_{\max}]$  and  $c_g$  in the proof of Theorem [5](#) can be written as  $c_g = \bar{\lambda}\beta \int_{\mu_{\min}}^{\mu_{\max}} \tilde{h}(\mu) \frac{\mu \bar{g}(\mu)}{\bar{\lambda}\beta} dF(\mu)$ . The integral is the expectation of  $h(\tilde{\mu})$  where  $\tilde{\mu}$  has distribution  $\bar{F}$ , and hence, is bounded from below by  $h_{\min}$  and from above by  $h_{\max}$ . The result follows as  $L_F = \bar{\lambda}/c_g$ .  $\square$

COROLLARY [1](#) Suppose that  $g(\mu)$  satisfies [\(17\)](#) strictly. Then,  $g(\mu)$  is the density function of  $\eta_{1,\infty}$  with respect to  $F$  under the  $h$ -random policy where

$$h(\mu) = \frac{\left( (1 + \beta)(\bar{\mu}_F)^{-1} - \beta \langle \iota, \eta_{1,\infty} \rangle^{-1} g(\mu) \right) \mu}{\beta \bar{\lambda} \langle \iota, \eta_{1,\infty} \rangle^{-1} g(\mu)}.$$

*Proof.* Let  $\bar{g}(\mu)$  be the density function of  $\bar{\psi}_{1,\infty}$  with respect to  $F$ . The definition of the limiting fairness measure and [\(10\)](#) implies that  $\bar{g}(\mu) = \beta \bar{\lambda} \langle \iota, \eta_{1,\infty} \rangle^{-1} g(\mu)$ . Plugging into the definition of  $c_g$ , we can see that for the proposed  $h(\mu)$  we have

$$\begin{aligned} c_g &= \int_{\mu_{\min}}^{\mu_{\max}} \left( \frac{1 + \beta}{\bar{\mu}_F} - \beta \langle \iota, \eta_{1,\infty} \rangle^{-1} g(\mu) \right) \mu dF(\mu) \\ &= \frac{1 + \beta}{\bar{\mu}_F} \int_{\mu_{\min}}^{\mu_{\max}} \mu dF(\mu) - \beta \langle \iota, \eta_{1,\infty} \rangle^{-1} \int_{\mu_{\min}}^{\mu_{\max}} \mu g(\mu) dF(\mu) \\ &= 1. \end{aligned}$$

Hence,  $L_F = \bar{\lambda}$ . Now, plugging this in [\(EC.14\)](#), we get the desired result.  $\square$

## EC.5. Proofs for Results Presented in Section [6](#)

THEOREM [6](#) If  $\sup_{\mu_{\min} \leq \mu \leq \mu_{\max}} |n^{1-\alpha} \mathbb{E}[I_k^n(\infty) | \tilde{\mu}_k^n = \mu] - \beta g(\mu) \bar{\lambda}^{\alpha-1} \bar{\mu}_F^{2-\alpha} \langle \iota, \eta_{\alpha,\infty} \rangle^{-1}| \rightarrow 0$ , then,

1. if  $n^{\alpha-1} f'(n^{\alpha-1}x) \rightarrow 0$  for all  $x > 0$  as  $n \rightarrow \infty$ , then for any  $\epsilon > 0$  there exists an  $N_\epsilon$  such that  $n > N_\epsilon$  implies that the optimal strategy for any server  $k$  in the  $n$ th system is  $\tilde{\mu}_k^{n,*} \in [\tilde{\mu}_{\min,k}^n, \tilde{\mu}_{\min,k}^n + \epsilon)$ ,

2. if the limiting stationary fairness measure is deterministic with a decreasing density  $g(\mu)$ , then for any  $\epsilon > 0$  there exists an  $N_\epsilon$  such that  $n > N_\epsilon$  implies that the optimal strategy for any server  $k$  in the  $n$ th system is  $\tilde{\mu}_k^{n,*} \in [\tilde{\mu}_{\min,k}^n, \tilde{\mu}_{\min,k}^n + \epsilon)$ ,
3. if  $n^{\alpha-1} f'(n^{\alpha-1}x) \rightarrow \infty$  for all  $x > 0$  as  $n \rightarrow \infty$  and  $g(\mu)$  is strictly increasing and concave, then for any  $\epsilon > 0$  there exists an  $N_\epsilon$  such that  $n > N_\epsilon$  implies that the optimal strategy for any server  $k$  in the  $n$ th system is  $\tilde{\mu}_k^{n,*} \in (\tilde{\mu}_{\max,k}^n - \epsilon, \tilde{\mu}_{\min,k}^n]$  with probability 1.

*Proof.* To simplify notation, define  $C = \beta \bar{\lambda}^{\alpha-1} \bar{\mu}_F^{2-\alpha} \langle \iota, \eta_\alpha \rangle^{-1}$ . The uniform convergence assumption implies that for any  $\rho > 0$ , there exists an  $N_\rho$  such that for all  $\mu_{\min} \leq \mu \leq \mu_{\max}$

$$|\mathbb{E}[I_k^n(\infty) | \tilde{\mu}_k^n = \mu] - n^{\alpha-1} C g(\mu)| \leq n^{\alpha-1} \rho. \quad (\text{EC.16})$$

First, we analyze the best response for server  $k$  for all large  $n$  for the approximating problem

$$\max_{\tilde{\mu}_{\min,k}^n \leq \mu \leq \tilde{\mu}_{\max,k}^n} f(n^{\alpha-1} C g(\mu)) - a_k^n c(\mu). \quad (\text{EC.17})$$

Taking the derivative of the objective, we get

$$n^{\alpha-1} g'(\mu) f'(n^{\alpha-1} C g(\mu)) - \tilde{a}_k^n c'(\mu). \quad (\text{EC.18})$$

First, we analyze part 1, i.e., the situation when  $n^{\alpha-1} f'(n^{\alpha-1}x) \rightarrow 0$  for all  $x > 0$ . We know that  $f(\mu)$  is concave and thus its derivative is decreasing. Since  $g(\mu)$  is continuous, it attains its minimum at  $\mu_g^* \in [\mu_{\min}, \mu_{\max}]$ . Then, we have  $f'(n^{\alpha-1} C g(\mu_g^*)) \geq f'(n^{\alpha-1} C g(\mu))$  for all  $\mu_{\min} \leq \mu \leq \mu_{\max}$ . Hence, there exists an  $N_1$  such that  $n^{\alpha-1} f'(n^{\alpha-1} C g(\mu_g^*)) < \frac{a_{\min} c_{\min}}{2 C g_{\max}^n}$  for all  $n > N_1$  and hence, the minimizer of [\(EC.17\)](#) is  $\mu_k^{n,*} = \tilde{\mu}_{\min,k}^n$  for all  $k$  and  $n > N_1$ . Using the gradient inequality for concave functions on  $f(n^{\alpha-1}x)$ , we get for any  $\mu_{\min} \leq \mu \leq \mu_{\max}$  that

$$\begin{aligned} f(n^{\alpha-1} C g(\mu)) - \tilde{a}_k^n c(\mu) &\leq f(n^{\alpha-1} C g(\mu_{\min,k}^n)) + n^{\alpha-1} C f'(n^{\alpha-1} C g(\mu_g^*)) (g(\mu) - g(\mu_{\min,k}^n)) \\ &\quad - \tilde{a}_k^n c(\mu_{\min,k}^n) - a_{\min} c_{\min} (\mu - \mu_{\min,k}^*). \end{aligned}$$

Hence, for any  $n > N_1$ , we have

$$f(n^{\alpha-1} C g(\mu)) - \tilde{a}_k^n c(\mu) \leq f(n^{\alpha-1} C g(\mu_{\min,k}^n)) - \tilde{a}_k^n c(\mu_{\min,k}^n) - \frac{a_{\min} c_{\min}}{2} (\mu - \mu_{\min,k}^*),$$

and for any  $\mu > \mu_{\min,k}^n + 6\epsilon(a_{\min}c_{\min})^{-1}$ ,

$$f(n^{\alpha-1}C(g(\mu))) - \tilde{a}_k^n c(\mu) \leq f(n^{\alpha-1}C(g(\mu_{\min,k}^n))) - \tilde{a}_k^n c(\mu_{\min,k}^n) - 3\epsilon. \quad (\text{EC.19})$$

Again using [\(EC.16\)](#), there exists an  $N_2$  such that  $n > N_2$  implies

$$\mathbb{E}[I_k^n(\infty)|\tilde{\mu}_k^n = \mu] \geq n^{\alpha-1} \frac{Cg(\mu_g^*)}{2}.$$

Using the mean-value theorem and the concavity of  $f(\cdot)$ , for any  $\mu_{\min} \leq \mu \leq \mu_{\max}$  and  $n > N_2 \vee N_\rho$

$$|f(\mathbb{E}[I_k^n(\infty)|\tilde{\mu}_k^n = \mu]) - f(n^{\alpha-1}Cg(\mu))| \leq n^{\alpha-1} f' \left( \frac{n^{\alpha-1}Cg(\mu_g^*)}{2} \right) \rho.$$

Now, choosing  $N_3$  such that  $n > N_3$  implies

$$n^{\alpha-1} f' \left( \frac{n^{\alpha-1}Cg(\mu_g^*)}{2} \right) \leq \frac{\epsilon}{\rho},$$

and using [\(EC.19\)](#), we have

$$f(\mathbb{E}[I_k^n(\infty)|\tilde{\mu}_k^n = \mu]) - \tilde{a}_k^n c(\mu) \leq f(\mathbb{E}[I_k^n(\infty)|\tilde{\mu}_k^n = \tilde{\mu}_{\min,k}^n]) - \tilde{a}_k^n c(\tilde{\mu}_{\min,k}^n) - \epsilon,$$

for all  $\mu > \mu_{\min,k}^n + 6\epsilon(a_{\min}c_{\min})^{-1}$  and  $n > (N_1 \vee N_2 \vee N_3 \vee N_\rho)$ .

Now, we consider the second case where  $g(\mu)$  is decreasing. As [\(EC.18\)](#) is negative for all  $\mu$ , the minimizer of [\(EC.17\)](#) is  $\mu_k^{n,*} = \tilde{\mu}_{\min,k}^n$  for all  $n$ . Following the same steps as in part 1, part 2 follows.

Now, we analyze the part 3. As  $f(\cdot)$  is concave,  $f'(n^{\alpha-1}Cg(\mu)) \geq f'(n^{\alpha-1}Cg(\mu_{\max}))$  for all  $\mu_{\min} \leq \mu \leq \mu_{\max}$ . Using this and the convexity of  $c(\mu)$ , there exists an  $N_4$ , such that for  $n > N_4$  the derivative in [\(EC.18\)](#) is positive for all  $\mu_{\min} \leq \mu \leq \mu_{\max}$ , which in turn implies the maximizer of [\(EC.17\)](#) is  $\mu_k^{n,*} = \tilde{\mu}_{\max,k}^n$ . Now, choosing  $N_1$  such that  $n > N_1$  implies  $n^{\alpha-1} f'(n^{\alpha-1}Cg(\mu_{\max})) > \frac{2a_{\min}c_{\min}}{Cg_{\min}}$  and following the same steps as in part 1, the theorem follows.  $\square$

To prove Theorem [7](#) we need the following uniform integrability result:

LEMMA EC.2. *For any  $\alpha > 1/2$ , the collection of random variables  $\{(\hat{I}_\alpha^n(\infty))^{-1}\mathbb{I}(I^n(\infty) > 0)\}_{n \in \mathbb{N}}$  is uniformly integrable.*

*Proof.* We need to prove that for any  $\rho > 0$ , there exists an  $M > 0$  such that

$$\sup_n \mathbb{E} \left[ \frac{n^\alpha}{I^n(\infty)} \mathbb{I}(I^n(\infty) > 0) \mathbb{I} \left( \frac{n^\alpha}{I^n(\infty)} > M \right) \right] < \rho. \quad (\text{EC.20})$$

For any  $n \in \mathbb{N}$ , we have

$$\begin{aligned} & \mathbb{E} \left[ \frac{n^\alpha}{I^n(\infty)} \mathbb{I}(I^n(\infty) > 0) \mathbb{I} \left( \frac{n^\alpha}{I^n(\infty)} > M \right) \right] \\ &= \mathbb{E} \left[ \frac{n^\alpha}{I^n(\infty)} \mathbb{I}(I^n(\infty) > 0) \mathbb{I} \left( \frac{n^\alpha}{I^n(\infty)} > M \right) \mathbb{I} \left( \left| \sum_{k=1}^{N^n} \mu_k^n - N^n \bar{\mu}_F \right| \leq \frac{\beta}{2} (\lambda^n)^\alpha (\bar{\mu}_F)^{1-\alpha} \right) \right] \\ & \quad + \mathbb{E} \left[ \frac{n^\alpha}{I^n(\infty)} \mathbb{I}(I^n(\infty) > 0) \mathbb{I} \left( \frac{n^\alpha}{I^n(\infty)} > M \right) \mathbb{I} \left( \left| \sum_{k=1}^{N^n} \mu_k^n - N^n \bar{\mu}_F \right| > \frac{\beta}{2} (\lambda^n)^\alpha (\bar{\mu}_F)^{1-\alpha} \right) \right] \\ &\leq \mathbb{E} \left[ \frac{n^\alpha}{I^n(\infty)} \mathbb{I}(I^n(\infty) > 0) \mathbb{I} \left( \frac{n^\alpha}{I^n(\infty)} > M \right) \mathbb{I} \left( \left| \sum_{k=1}^{N^n} \mu_k^n - N^n \bar{\mu}_F \right| \leq \frac{\beta}{2} (\lambda^n)^\alpha (\bar{\mu}_F)^{1-\alpha} \right) \right] \\ & \quad + n^\alpha \mathbb{P} \left( \left| \sum_{k=1}^{N^n} \mu_k^n - N^n \bar{\mu}_F \right| > \frac{\beta}{2} (\lambda^n)^\alpha (\bar{\mu}_F)^{1-\alpha} \right). \end{aligned} \quad (\text{EC.21})$$

First, we concentrate on the first term of the right-hand side. From Assumption [1](#) for any  $\epsilon_1 > 0$ , there exists an  $N_1$  such that for any  $n > N_1$ ,  $n^{-1} \lambda^n \leq \bar{\lambda} + \epsilon_1$ . Hence, with  $n > N_1$ , we define

$$K_\alpha = \left\lceil \frac{\beta (\bar{\lambda} + \epsilon_1)^\alpha \bar{\mu}_F^{1-\alpha}}{4\mu_{\max}} \right\rceil.$$

Now, we consider a sequence of birth-death processes  $\{Y^n(t)\}_{n \in \mathbb{N}}$ . The birth rate in the  $n$ th system is uniformly equal to  $\lambda^n$  for any state. When the system is at state  $Y^n(t) = i$ , the death rate is given by

$$\nu_i = \begin{cases} i\mu_{\min} & \text{if } i \leq N^n - n^\alpha K_\alpha \\ \lambda^n + \frac{\beta}{4} (\lambda^n)^\alpha \bar{\mu}_F^{1-\alpha} & \text{if } i > N^n - n^\alpha K_\alpha \end{cases}.$$

Now, we show that the process  $N^n - Y^n(t)$  is stochastically smaller than  $\hat{I}^n(t)$ . Remembering that due to non-idling property, we have  $\hat{I}^n(t) = (\hat{X}_\alpha^n(t))^-$ , we can write

$$\begin{aligned} \hat{I}_\alpha^n &= (\hat{X}_\alpha^n(0))^- + n^{-\alpha} \sum_{i=1}^{\tilde{S}^n(t)} \mathbb{I} \left( (\hat{X}_\alpha^n(\theta_{S,i}^n))^- = 0 \right) \mathbb{I} (U_i^n \leq p_i^n(\theta_{S,i}^n)) \\ & \quad - n^{-\alpha} \sum_{i=1}^{A^n(t)} \mathbb{I} \left( (\hat{X}_\alpha^n(\theta_{A,i}^n))^- > 0 \right). \end{aligned}$$

Similarly, we can couple the birth-death process with the idleness process as

$$Y^n(t) = Y^n(0) - n^{-\alpha} \sum_{i=1}^{\tilde{S}^n(t)} \mathbb{I}(U_i^n \leq \tilde{p}_i^n(\theta_{S_i}^n -)) + n^{-\alpha} \sum_{i=1}^{A^n(t)} \mathbb{I}\left(\left(\hat{Y}_1^n(\theta_{A,i}^n -)\right)^- > 0\right),$$

where  $\tilde{p}_i^n(\theta_{S_i}^n -) = \frac{\nu_i}{\sum_{k=1}^{N^n} \bar{\mu}_k^n}$ . Suppose  $N^n - Y^n(0) = I^n(0)$  and define  $\vartheta^n = \inf\{t : N^n - Y^n(t) > I^n(t)\}$ .

Then, with probability 1,  $N^n - Y^n(\vartheta-) = I^n(\vartheta-)$ . As for any state where  $I^n(t) = i$ ,  $\frac{\nu_i}{\sum_{k=1}^{N^n} \bar{\mu}_k^n} \leq \frac{\sum_{k=1}^{N^n} \mu_k(1-I_k^n(t))}{\sum_{k=1}^{N^n} \mu_k}$ , if  $\vartheta$  is an event epoch for  $S^n(t)$ , we have  $N^n - Y^n(\vartheta-) \leq N^n - Y^n(\vartheta-)$ . If  $\vartheta$  is an event epoch for  $A^n$ , then  $N^n - Y^n(\vartheta-) \leq N^n - Y^n(\vartheta-)$ . This leads to a contradiction and we conclude that  $N^n - Y^n(t)$  is stochastically less than  $I^n(t)$ . Now,

$$\begin{aligned} \mathbb{E}\left[\frac{n^\alpha}{I^n(\infty)} \mathbb{I}(I^n(\infty) > 0) \mathbb{I}\left(\frac{n^\alpha}{I^n(\infty)} > \frac{2}{K_\alpha}\right)\right] &\leq n^\alpha \mathbb{P}\left(I^n(\infty) < \frac{K_\alpha n^\alpha}{2}\right) \\ &\leq n^\alpha \mathbb{P}\left(Y^n(\infty) \geq N^n - \frac{K_\alpha n^\alpha}{2}\right). \end{aligned}$$

Now, as  $\nu_i > \lambda^n$  for all  $i \geq N^n - n^\alpha K_\alpha$ , for each  $n$ , the birth-death process  $Y^n(t)$  is positive recurrent and for all  $i \geq N^n - n^\alpha K_\alpha$ , we have

$$\begin{aligned} \mathbb{P}(Y^n(\infty) = i) &= \left(\frac{\lambda^n}{\lambda^n + \frac{\beta}{4}(\lambda^n)^\alpha \bar{\mu}_F^{1-\alpha}}\right)^{i - N^n + n^\alpha K_\alpha} \times \mathbb{P}(Y^n(\infty) = N^n - n^\alpha K_\alpha) \\ &\leq \left(\frac{\lambda^n}{\lambda^n + \frac{\beta}{4}(\lambda^n)^\alpha \bar{\mu}_F^{1-\alpha}}\right)^{i - N^n + n^\alpha K_\alpha}. \end{aligned}$$

Hence,

$$n^\alpha \mathbb{P}\left(Y^n(\infty) \geq N^n - \frac{n^\alpha K}{2}\right) \leq \left(\frac{\lambda^n}{\lambda^n + \frac{\beta}{4}(\lambda^n)^\alpha \bar{\mu}_F^{1-\alpha}}\right)^{n^\alpha K_\alpha/2} \frac{(\lambda^n + \frac{\beta}{4}(\lambda^n)^\alpha \bar{\mu}_F^{1-\alpha})n^\alpha}{\frac{\beta}{4}(\lambda^n)^\alpha \bar{\mu}_F^{1-\alpha}}.$$

When  $\alpha > 1/2$ , we see that the first-term on the right-hand side approaches 0 exponentially fast, whereas the second term increases linearly as  $n \rightarrow \infty$ . This implies that there exists an  $N_2$  where the first term on the right-hand side of [\(EC.21\)](#) is less than  $\rho/2$  for  $n > N_2$ .

To address the second term on the right-hand side of [\(EC.21\)](#), choose  $p$  to be the smallest even number such that  $p\alpha > p/2 + \alpha$ . Then, using Markov's inequality

$$n^\alpha \mathbb{P}\left(\left|\sum_{k=1}^{N^n} \mu_k^n - N^n \bar{\mu}_F\right| > \frac{\beta}{2}(\lambda^n)^\alpha (\bar{\mu}_F)^{1-\alpha}\right) \leq \frac{n^\alpha \sum_{j=1}^{p/2} \binom{N^n}{2j} (\mu_{\max} - \mu_{\min})^p}{\left(\frac{\beta}{2}(\lambda^n)^\alpha (\bar{\mu}_F)^{1-\alpha}\right)^p}.$$

It is now easy to see that the numerator scales with  $p/2 + \alpha$  where as the denominator scales with  $p\alpha$ . Hence, the right-hand side approaches 0 as  $n \rightarrow \infty$  and there exists an  $N_3$  such that  $n > N_3$  implies

$$n^\alpha \mathbb{P} \left( \left| \sum_{k=1}^{N^n} \mu_k^n - N^n \bar{\mu}_F \right| > \frac{\beta}{2} (\lambda^n)^\alpha (\bar{\mu}_F)^{1-\alpha} \right) < \rho/2.$$

Choosing  $M = \max\{2/K_\alpha, N_1^\alpha, N_2^\alpha, N_3^\alpha\}$ , [\(EC.20\)](#) holds and our result follows.  $\square$

**THEOREM [7](#)** *As  $n \rightarrow \infty$ , we have  $\mathbb{E}[I_k^n(\infty) | \mu_k = m_k] \rightarrow \frac{m_k \langle h, \bar{\psi}_\infty \rangle}{m_k \langle h, \bar{\psi}_\infty \rangle + \lambda h(m_k)}$ .*

*Proof.* We define  $U_{A,k,i}^n = 1$  if the  $i$ th event epoch of  $A^n(t)$  corresponds to an arrival directly route to server  $k$  and 0 otherwise. Similarly, we define  $U_{S,k,i}^n = 1$  if the event epoch of  $S^n(t)$  corresponds to an actual service completion at server  $k$ . Then, we have the following balance equation:

$$\begin{aligned} I_k^n(t) &= I_k^n(0) + \sum_{i=1}^{S^n(t)} U_{S,k,i}^n - \sum_{i=1}^{A^n(t)} U_{A,k,i}^n \\ &= I_k^n(0) + \left( \sum_{i=1}^{S^n(t)} U_{S,k,i}^n - \mu_k \int_0^t (1 - I_k^n(s-)) ds \right) + \mu_k \int_0^t (1 - I_k^n(s-)) ds \\ &\quad - \left( \sum_{i=1}^{A^n(t)} U_{A,k,i}^n - \frac{\lambda^n}{n} \int_0^t \frac{h(\tilde{\mu}_k^n) I_k^n(s-)}{\langle h, \bar{\psi}_{1,s-}^n \rangle} ds \right) - \frac{\lambda^n}{n} \int_0^t \frac{h(\tilde{\mu}_k^n) I_k^n(s-)}{\langle h, \bar{\psi}_{1,s-}^n \rangle} ds. \end{aligned}$$

The second and fourth terms on the right-hand side are Poisson martingales with initial value 0. Assuming that the system is in stationarity, taking the expectation of both sides and using Fubini's theorem, we have

$$\frac{\lambda^n h(\mu)}{n} \mathbb{E} \left[ \frac{I_k^n(\infty)}{\langle h, \bar{\psi}_{1,\infty}^n \rangle} | \mu_k = \mu \right] + \mu \mathbb{E}[I_k^n(\infty) | \mu_k = \mu] = \mu.$$

**Theorem [5](#)** implies that  $\langle h, \bar{\psi}_\infty^n \rangle \xrightarrow{p} \langle h, \bar{\psi}_\infty \rangle$  where the limit is deterministic. Using Lemma [EC.2](#) and the notation  $L_F = \bar{\lambda} \langle h, \bar{\psi}_\infty \rangle^{-1}$ , we can find an  $N_\epsilon$  such that  $n > N_\epsilon$  implies

$$|L_F h(\mu) \mathbb{E}[I_k^n(\infty) | \mu_k = \mu] + \mu \mathbb{E}[I_k^n(\infty) | \mu_k = \mu] - \mu| = \epsilon.$$

Re-arranging the equation, the desired uniform convergence result holds.  $\square$

THEOREM [8](#) For  $1/2 \leq \alpha \leq 1$ , under any idle-time order based policy, [\(20\)](#) holds and we have

$$n^{1-\alpha} \mathbb{E}[I_k^n(\infty) | \tilde{\mu}_k^n = \mu] \rightarrow \mu \beta \bar{\lambda}^{\alpha-1} (\bar{\mu}_F^{-\alpha} \sigma_F^2 + \bar{\mu}_F^{2-\alpha}), \quad \text{for all } 1/2 \leq \alpha < 1, \quad \text{and}$$

$$\mathbb{E}[I_k^n(\infty) | \tilde{\mu}_k^n = \mu] \rightarrow \frac{\beta \langle \iota, \eta_{1,\infty} \rangle^{-1}}{\mu \beta \langle \iota, \eta_{1,\infty} \rangle^{-1} + 1}, \quad \text{for } \alpha = 1,$$

as  $n \rightarrow \infty$ , where  $\eta_{1,\infty}$  is the limiting fairness measure for  $h$ -random policy with  $h(\mu) = 1$  as given in [Theorem 5](#).

*Proof.* Theorem 9 in [Gopalakrishnan et al. \(2016\)](#) ensures that all the idle-time order based policies have the same stationary distribution. Hence, it is enough to prove the theorem only for one idle-time order based policy for each  $\alpha$ . Hence, the case when  $\alpha = 1$  follows from our [Theorem 7](#) when taking  $h(\mu) = 1$  for all  $\mu_{\min} \leq \mu \leq \mu_{\max}$ . To prove the result for  $1/2 \leq \alpha < 1$ , we concentrate on the longest-idle-server-first policy and follow a similar approach to the proofs of [Lemma 4](#) and [Theorem 6](#) in [Büke and Qin \(2023\)](#).

As in the proof of [Lemma 1](#) we define the  $i$ th event epoch of the arrival process  $A^n(t)$  as  $\theta_{A,i}^n$  and the inter-arrival time between arrival  $i-1$  and  $i$  as  $u_i^n = \theta_{A,i}^n - \theta_{A,i-1}^n$ . As the arrival process is a Poisson process,  $u_i^n$  are independent exponential random variables with rate  $\lambda^n$ . Similarly, we define the  $i$ th epoch of the potential service completion process,  $S_k^n(t)$ , of server  $k$  as  $\theta_{S,k,i}^n$  and the inter-event time between  $(i-1)$ st and  $i$ th epoch as  $v_{k,i}^n = \theta_{S,k,i}^n - \theta_{S,k,i-1}^n$  for all  $i \in \mathbb{N}$ , where  $v_{k,i}^n$  are independent exponential random variables with rate  $\tilde{\mu}_k^n$ . We also denote the  $i$ th epoch of the actual service completion process,  $D_k^n(t)$ , of server  $k$  as  $\bar{\theta}_{S,k,i}^n$ . We define  $\phi_{k,i}^n$  the idling time of server  $k$  after the  $i$ th server completion as  $\bar{\phi}_{k,i}^n := \inf\{t - \bar{\theta}_{S,k,i}^n : I_k^n(t) = 0, t > \bar{\theta}_{S,k,i}^n\}$ . For longest-idle-server-first, we have

$$\bar{\phi}_{k,i}^n = \sum_{j=2}^{I^n(\bar{\theta}_{S,k,i}^n)} u_{A(\bar{\theta}_{S,k,i}^n)+j}^n + (u_{A(\bar{\theta}_{S,k,i}^n)+1} - \bar{\theta}_{S,k,i}^n).$$

Using the expression as the start point, for the  $i$ th event epoch of the potential service completion process  $S_k^n(t)$ , we associate the potential idling time of server  $k$ ,  $\phi_{k,i}^n$ , defined as

$$\phi_{k,i}^n = \sum_{j=2}^{I^n(\theta_{S,k,i}^n)} u_{A(\theta_{S,k,i}^n)+j}^n + (u_{A(\theta_{S,k,i}^n)+1} - \theta_{S,k,i}^n).$$

We also define  $\phi_{-k}^n := \inf\{t \geq 0 : I_k^n(t) = 0\}$  as the first time server  $k$  is busy and

$$\phi_{-k}^n \leq \sum_{j=1}^{I_k^n(0)} u_j^n.$$

Similar to equation (14) in [Büke and Qin \(2023\)](#), we can write

$$\begin{aligned} \int_0^t I_k^n(s) ds &= (\phi_{-k}^n \wedge t) + \sum_{i=1}^{D_k^n(t)} (\bar{\phi}_{k,i}^n \wedge (t - \bar{\theta}_{S,k,i}^n)) \\ &= (\phi_{-k}^n \wedge t) + \sum_{i=1}^{D_k^n(t)} \bar{\phi}_{k,i}^n - \sum_{i=1}^{D_k^n(t)} (\bar{\phi}_{k,i}^n - t + \bar{\theta}_{S,k,i}^n)^+. \end{aligned} \quad (\text{EC.22})$$

For the proofs in this section, we assume that the system starts in stationarity. Hence, for all  $t \geq 0$ , we have

$$\mathbb{E}[I_k^n(\infty) | \tilde{\mu}_k^n = \mu] = \mathbb{E}[I_k^n(t) | \tilde{\mu}_k^n = \mu].$$

We need the following lemma to prove our theorem.

LEMMA EC.3. *For any  $k$ ,  $I_k^n(\infty) \xrightarrow{p} 0$  and  $\mathbb{E}[I_k^n(\infty) | \mu_k^n = \mu] \rightarrow 0$  as  $n \rightarrow \infty$ .*

*Proof.* We have

$$\begin{aligned} \mathbb{E}\left[\int_0^t I_k^n(s) ds | \tilde{\mu}_k^n = \mu\right] &= \int_0^t \mathbb{E}[I_k^n(s) | \tilde{\mu}_k^n = \mu] ds \\ &= \mathbb{E}[(\phi_{-k}^n \wedge t) | \tilde{\mu}_k^n = \mu] + \mathbb{E}\left[\sum_{i=1}^{D_k^n(t)} \bar{\phi}_{k,i}^n \wedge (t - \bar{\theta}_{S,k,i}^n) | \tilde{\mu}_k^n = \mu\right] \\ &\leq \mathbb{E}[\phi_{-k}^n | \tilde{\mu}_k^n = \mu] + \mathbb{E}\left[\sum_{i=1}^{S_k^n(t)} \phi_{k,i}^n | \tilde{\mu}_k^n = \mu\right] \\ &\leq \frac{\mathbb{E}[I^n(\infty)]}{\lambda^n} \\ &\quad + \mathbb{E}\left[\sum_{i=1}^{\infty} \mathbb{I}(\theta_{S,k,i}^n \leq t) \left(\sum_{j=2}^{I^n(\theta_{S,k,i}^n)} u_{A(\theta_{S,k,i}^n)+j}^n + (u_{A(\theta_{S,k,i}^n)+1} - \theta_{S,k,i}^n)\right) | \tilde{\mu}_k^n = \mu\right] \\ &\leq \frac{\mathbb{E}[I^n(\infty)]}{\lambda^n} \\ &\quad + \sum_{i=1}^{\infty} \mathbb{E}\left[\mathbb{I}(\theta_{S,k,i}^n \leq t) \mathbb{E}\left[\left(\sum_{j=2}^{I^n(\theta_{S,k,i}^n)} u_{A(\theta_{S,k,i}^n)+j}^n + (u_{A(\theta_{S,k,i}^n)+1} - \theta_{S,k,i}^n)\right) | \mathcal{F}_{\theta_{S,k,i}^n} - \right] | \tilde{\mu}_k^n = \mu\right] \\ &\leq \frac{\mathbb{E}[I^n(\infty)]}{\lambda^n} + \mathbb{E}\left[\sum_{i=1}^{S_k^n(t)} \frac{(I^n(\theta_{S,k,i}^n) + 1)}{\lambda^n} | \tilde{\mu}_k^n = \mu\right] \\ &\leq \frac{\mathbb{E}[I^n(\infty)]}{\lambda^n} + \frac{\mu t \mathbb{E}[I^n(\infty) + 1 | \tilde{\mu}_k^n = \mu]}{\lambda^n} \rightarrow 0. \end{aligned}$$

As  $\mu \leq \mu_{\max}$ , the convergence is uniform. The convergence in probability follows using Markov's inequality, which concludes the proof.  $\square$

Our stationarity assumption combined with [\(EC.22\)](#) implies that

$$\begin{aligned} n^{1-\alpha} \mathbb{E}[I_k^n(\infty) | \tilde{\mu}_k^n = \mu] &= \frac{n^{1-\alpha}}{t} \int_0^t \mathbb{E}[I_k^n(s) | \tilde{\mu}_k^n = \mu] ds \\ &= \frac{n^{1-\alpha}}{t} \mathbb{E}[(\phi_{-k}^n \wedge t) | \tilde{\mu}_k^n = \mu] + \frac{n^{1-\alpha}}{t} \mathbb{E} \left[ \sum_{i=1}^{D_k^n(t)} \bar{\phi}_{k,i}^n | \tilde{\mu}_k^n = \mu \right] \\ &\quad - \frac{n^{1-\alpha}}{t} \mathbb{E} \left[ \sum_{i=1}^{D_k^n(t)} (\bar{\phi}_{k,i}^n - t + \bar{\theta}_{S,k,i}^n)^+ | \tilde{\mu}_k^n = \mu \right]. \end{aligned}$$

Hence, for all  $t \geq 0$ , we can bound  $n^{1-\alpha} \mathbb{E}[I_k^n(\infty) | \tilde{\mu}_k^n = \mu]$  as

$$n^{1-\alpha} \mathbb{E}[I_k^n(\infty) | \tilde{\mu}_k^n = \mu] \geq \frac{n^{1-\alpha}}{t} \mathbb{E} \left[ \sum_{i=1}^{D_k^n(t)} \phi_i^n | \tilde{\mu}_k^n = \mu \right] - \frac{n^{1-\alpha}}{t} \mathbb{E} \left[ \sum_{i=1}^{D_k^n(t)} (\phi_i^n - (t - \bar{\theta}_{S,k,i}^n))^+ | \tilde{\mu}_k^n = \mu \right] \quad (\text{EC.23})$$

$$n^{1-\alpha} \mathbb{E}[I_k^n(\infty) | \tilde{\mu}_k^n = \mu] \leq \frac{n^{1-\alpha}}{t} \mathbb{E} \left[ \sum_{i=1}^{D_k^n(t)} \phi_i^n | \tilde{\mu}_k^n = \mu \right] + \frac{n^{1-\alpha}}{t} \mathbb{E}[\phi_{-k}^n | \tilde{\mu}_k^n = \mu]. \quad (\text{EC.24})$$

The first terms on the right-hand sides of [\(EC.23\)](#) and [\(EC.24\)](#) are the same and we first concentrate on this. We have then

$$\begin{aligned} \frac{n^{1-\alpha}}{t} \mathbb{E} \left[ \sum_{i=1}^{D_k^n(t)} \phi_i^n | \tilde{\mu}_k^n = \mu \right] &= \frac{n^{1-\alpha}}{t} \mathbb{E} \left[ \sum_{i=1}^{S_k^n(t)} \sum_{j=1}^{I^n(\bar{\theta}_{S,k,i}^n)} u_{A(\bar{\theta}_{S,k,i}^n)+j}^n | \tilde{\mu}_k^n = \mu \right] \\ &= \frac{n^{1-\alpha}}{t} \mathbb{E} \left[ \sum_{i=1}^{S_k^n(t)} (1 - I_k^n(\theta_{S,k,i}^n -)) \sum_{j=1}^{I^n(\theta_{S,k,i}^n)} u_{A(\theta_{S,k,i}^n)+j}^n | \tilde{\mu}_k^n = \mu \right] \\ &= \frac{n^{1-\alpha}}{t} \mathbb{E} \left[ \sum_{i=1}^{S_k^n(t)} \sum_{j=1}^{I^n(\theta_{S,k,i}^n)} u_{A(\theta_{S,k,i}^n)+j}^n | \tilde{\mu}_k^n = \mu \right] \\ &\quad - \frac{n^{1-\alpha}}{t} \mathbb{E} \left[ \sum_{i=1}^{S_k^n(t)} I_k^n(\theta_{S,k,i}^n -) \sum_{j=1}^{I^n(\theta_{S,k,i}^n)} u_{A(\theta_{S,k,i}^n)+j}^n | \tilde{\mu}_k^n = \mu \right] \\ &= \frac{n^{1-\alpha}}{t} \mathbb{E} \left[ \int_0^t \sum_{j=1}^{I^n(s-)+1} u_{A(s-)+j}^n dS_k^n(s) | \tilde{\mu}_k^n = \mu \right] \\ &\quad - \frac{n^{1-\alpha}}{t} \mathbb{E} \left[ \int_0^t \left( I_k^n(s-) \sum_{j=1}^{I^n(s-)} u_{A(s-)+j}^n \right) dS_k^n(s) | \tilde{\mu}_k^n = \mu \right] \end{aligned}$$

$$\begin{aligned}
&= \frac{n\mu}{\lambda^n t} \mathbb{E} \left[ \int_0^t (\hat{I}_\alpha^n(s-) + n^{-\alpha}) ds | \tilde{\mu}_k^n = \mu \right] \\
&\quad - \frac{n\mu}{\lambda^n t} \mathbb{E} \left[ \int_0^t I_k^n(s-) (\hat{I}_\alpha^n(s-) + n^{-\alpha}) ds | \tilde{\mu}_k^n = \mu \right].
\end{aligned}$$

Using the stochastic boundedness of  $\hat{I}_\alpha^n$  and Lemma [EC.3](#) the second term converges to 0. Using the stationarity assumption,

$$\sup_{\mu_{\min} \leq \mu \leq \mu_{\max}} \left| \frac{n\mu}{\lambda^n t} \mathbb{E} \left[ \int_0^t (\hat{I}_\alpha^n(s-) + n^{-\alpha}) ds | \tilde{\mu}_k^n = \mu \right] - \frac{\mu}{\lambda} \mathbb{E}[\hat{I}_\alpha^n(\infty) | \tilde{\mu}_k^n = \mu] \right| \rightarrow 0.$$

Next, we concentrate on the second term on the right-hand side of [\(EC.23\)](#). Each summand corresponds to the remaining idling time from the service completion at  $\bar{\theta}_{S,k,i}^n$ . This implies only the summand corresponding to the last service completion is positive and

$$(\phi_i^n - (t - \bar{\theta}_{S,k,i}^n))^+ \leq \sum_{j=1}^{I^n(t)} u_{A^n(t)+j}.$$

Hence,

$$\begin{aligned}
\frac{n^{1-\alpha}}{t} \mathbb{E} \left[ \sum_{i=1}^{D_k^n(t)} (\phi_i^n - (t - \bar{\theta}_{S,k,i}^n))^+ | \mu_k^n = \mu \right] &\leq \frac{n^{1-\alpha}}{t} \mathbb{E} \left[ \sum_{j=1}^{I^n(t)} u_{A^n(t)+j} | \mu_k^n = \mu \right] \\
&= \frac{n^{1-\alpha}}{t} \mathbb{E} \left[ \mathbb{E} \left[ \sum_{j=1}^{I^n(t)} u_{A^n(t)+j} | \mathcal{F}_t \right] | \mu_k^n = \mu \right] \\
&= \frac{n}{\lambda^n t} \mathbb{E} \left[ \hat{I}_\alpha^n(t) | \mu_k^n = \mu \right] \\
&= \frac{n}{\lambda^n t} \mathbb{E} \left[ \hat{I}_\alpha^n(\infty) | \mu_k^n = \mu \right].
\end{aligned}$$

Similarly, we can bound the second term on the right-hand side of [\(EC.24\)](#) as

$$\frac{n^{1-\alpha}}{t} \mathbb{E}[\phi_{-k}^n | \tilde{\mu}_k^n = \mu] \leq \frac{n^{1-\alpha}}{t} \mathbb{E} \left[ \sum_{j=1}^{I^n(\infty)} u_j^n | \tilde{\mu}_k^n = \mu \right] = \frac{n}{\lambda^n t} \mathbb{E} \left[ \hat{I}_\alpha^n(\infty) | \mu_k^n = \mu \right].$$

Taking  $t$  large enough, both terms can be made arbitrarily small and hence [\(EC.23\)](#) and [\(EC.24\)](#) implies

$$\sup_{\mu_{\min} \leq \mu \leq \mu_{\max}} \left| n^{1-\alpha} \mathbb{E}[I_k^n(\infty) | \tilde{\mu}_k^n = \mu] - \frac{\mu}{\lambda} \mathbb{E}[\hat{I}_\alpha^n(\infty) | \tilde{\mu}_k^n = \mu] \right| \rightarrow 0.$$

Now, plugging in the expected value to be  $\beta \bar{\lambda}^\alpha \bar{\mu}_F^{1-\alpha} \langle \iota, \eta_{\alpha, \infty} \rangle$  with  $\langle \iota, \eta_{\alpha, \infty} \rangle = \bar{\mu}_F^{-1} (\sigma_F^2 + \bar{\mu}_F^2)$ , the result follows.  $\square$

LEMMA 5 Under Assumption 4, the limiting utility function  $U_k(\mu)$  is concave.

*Proof.* The utility of idleness function is increasing and concave. Hence, to prove the concavity of the first part, it is enough to prove that the idleness experienced by a server with rate  $\mu$ ,  $(1 + L_{F(0)}\tilde{h}(\mu))^{-1}$ , is concave (see, e.g., page 86 in Boyd and Vandenberghe [2004]). Taking the second derivative yields

$$\frac{d^2(1 + L_{F(0)}\tilde{h}(\mu))^{-1}}{d\mu^2} = \frac{L_{F(0)}(L_{F(0)}(2\tilde{h}'(\mu)^2 - \tilde{h}(\mu)\tilde{h}''(\mu)) - \tilde{h}''(\mu))}{(1 + L_{F(0)}\tilde{h}(\mu))^3}.$$

Using the convexity of  $\tilde{h}(\mu)$ , we can conclude that the second derivative is negative for the idleness experienced by a server with rate  $\mu$  is concave under (24) and hence, the result follows.  $\square$

THEOREM 9 If  $F$  is an equilibrium service rate distribution, the distribution function  $F$  has the form in (27), where  $L_F$  is the solution of

$$\int_{\mu_{\min}}^{\mu_{\max}} \mu \frac{1 - \beta L_F \tilde{h}(\mu)}{1 + L_F \tilde{h}(\mu)} dF(\mu | L_F) = 0.$$

*Proof.* As  $L_F$  uniquely characterizes the distribution of idleness among servers, our result will follow if the distribution of service rates resulting from  $L_F$  also yields the same  $L_F$  for the  $h$ -random policy under consideration. Plugging in (16), this can be written as

$$\int_{\mu_{\min}}^{\mu_{\max}} \mu \frac{1 + \beta}{\bar{\mu}_F (1 + L_F \tilde{h}(\mu))} dF(\mu | L_F) = \beta.$$

Taking  $\bar{\mu}_F$  to the right-hand side and writing it as an integral, we get

$$\int_{\mu_{\min}}^{\mu_{\max}} \mu \frac{1 + \beta}{1 + L_F \tilde{h}(\mu)} dF(\mu) = \beta \int_{\mu_{\min}}^{\mu_{\max}} \mu dF(\mu | L_F).$$

Re-arranging the terms, we get the desired result.  $\square$

PROPOSITION 2 Let the distribution of  $\tilde{a}_k^n$ ,  $F_a$ , be continuous. Then, Equation (28) has a solution in the interval  $[1/(\beta\tilde{h}(\mu_{\min})), 1/(\beta\tilde{h}(\mu_{\max}))]$  and has no solution outside of this interval.

*Proof.* As  $a_k^n$  is a continuous random variable, using the continuity of  $C(\mu, L_{F(0)})$  we can conclude that if  $L_i \rightarrow L_{F(0)}$ , we have  $F(\mu|L_i) \rightarrow F(\mu|L_{F(0)})$  for all  $\mu \in [\mu_{\min}, \mu_{\max}]$ . Hence,

$$\begin{aligned} & \left| \int_{\mu_{\min}}^{\mu_{\max}} \mu \frac{1 - \beta L_i \tilde{h}(\mu)}{1 + L_i \tilde{h}(\mu)} dF(\mu|L_i) - \int_{\mu_{\min}}^{\mu_{\max}} \mu \frac{1 - \beta L_{F(0)} \tilde{h}(\mu)}{1 + L_{F(0)} \tilde{h}(\mu)} dF(\mu|L_{F(0)}) \right| \\ & \leq \left| \int_{\mu_{\min}}^{\mu_{\max}} \mu \frac{1 - \beta L_i \tilde{h}(\mu)}{1 + L_i \tilde{h}(\mu)} dF(\mu|L_i) - \int_{\mu_{\min}}^{\mu_{\max}} \mu \frac{1 - \beta L_{F(0)} \tilde{h}(\mu)}{1 + L_{F(0)} \tilde{h}(\mu)} dF(\mu|L_{F_i}) \right| \\ & \quad + \left| \int_{\mu_{\min}}^{\mu_{\max}} \mu \frac{1 - \beta L_{F(0)} \tilde{h}(\mu)}{1 + L_{F(0)} \tilde{h}(\mu)} dF(\mu|L_i) - \int_{\mu_{\min}}^{\mu_{\max}} \mu \frac{1 - \beta L_{F(0)} \tilde{h}(\mu)}{1 + L_{F(0)} \tilde{h}(\mu)} dF(\mu|L_{F(0)}) \right|. \end{aligned}$$

As  $i \rightarrow \infty$ , the first term on the right-hand side converges due to continuity of the integrand, and the second term converges using the definition of weak convergence, which implies the left-hand side of (28) is continuous with respect to  $L_F$ . Now, if  $L_F = 1/(\beta \tilde{h}(\mu_{\min}))$ , the integrand of (28) is non-negative for all  $\mu \in [\mu_{\min}, \mu_{\max}]$  and  $\tilde{h}(\mu)$  being strictly decreasing, implies that the integral is positive for all  $L_F \leq 1/(\beta \tilde{h}(\mu_{\min}))$ . Similarly, if  $L_F = 1/(\beta \tilde{h}(\mu_{\max}))$ , the integrand is non-positive and the integral is negative. Using the intermediate value theorem, the result follows.  $\square$
